# Supplementary material
Source: PubMed Central journal article supplement (PMC11134479)
Supplement: NIHMS1990790-supplement-Schneider_et_al_Supplemental.pdf [file NIHMS1990790-supplement-Schneider_et_al_Supplemental.pdf]

## **Evolution of the facial skin microbiome during puberty in normal and acne skin.**

A.M. Schneider,<sup>1</sup> Z.T. Nolan,<sup>1</sup> K. Banerjee,<sup>2</sup> A.R. Paine,<sup>1</sup> Z. Cong,<sup>1</sup> S.L. Gettle,<sup>1</sup> A.L. Longenecker,<sup>1</sup> X. Zhan,<sup>3</sup> G.W. Agak,<sup>4</sup> A.M. Nelson<sup>1</sup>

### **Supplementary Information**

#### **1. Materials and Methods**

- a. Human Subjects, Cohort Characteristics and IGA scale
- b. Tanner Stage Evaluation Form
- c. Sebum Measurements
- d. Microbiome Sampling
- e. Metagenomic sequencing, processing, and taxonomic identification
- f. Diversity Analyses and Statistics
- g. *C. acnes* Strain Level Analysis
- h. Functional Profile Analysis

#### **2. Supplemental Tables**

- a. Table S1: Patient demographics and metadata
- b. Table S2: Summary statistics for covariates
- c. Table S3: Total number of quality sequencing reads
- d. **Table S4: 101 species removed before analyses.**
- e. Table S5: Top 20 most abundant species
- f. Table S6: Top 20 most abundant species within Tanner stages 1-2
- g. Table S7: Top 20 most abundant species within Tanner stages 3-5
- h. Table S8: 45 species (37 bacteria, 8 viruses) present only on normal skin
- i. Table S9: 16 species (14 bacteria, 2 viruses) present only on acne skin
- j. Table S10: Frequency distribution of strains within the SLST clusters
- k. **Table S11: *C. acnes* strains present in this study**
- l. Table S12: p-values comparing  $\alpha$ -diversities (Shannon indices) of the *C. acnes* SLST clusters
- m. Table S13: p-values comparing  $\beta$ -diversities of the *C. acnes* SLST clusters
- n. Table S14:  $\alpha$ -diversity comparison of SLST groups
- o. Table S15:  $\beta$ -diversity comparison of SLST groups
- p. Table S16: Network mapping of significant enzymes
- q. Table S17: Unique and significant enzymes identified by network mapping

#### **3. Supplemental Figures**

- a. Figure S1: Positive and negative control data
- b. Figure S2:  $\alpha$ - and  $\beta$ -diversity shift significantly over puberty regardless of disease state
- c. Figure S3: Viral composition by species and individual patient
- d. Figure S4 KEGG Pathway map of Porphyrin and Chlorophyll Metabolism identifying location of the 16 significantly enriched KO terms

#### **4. Supplemental Results**

- a. Non-human Sequences Summary

#### **5. Supplemental References**

## **Materials and Methods**

### **Human Subjects**

Forty-eight volunteers were recruited under an approved Institutional Review Board protocol (#8042) from the Pennsylvania State University College of Medicine. All participants provided written informed assent with parental consent prior to the study. Participants included males and females, ages 7-17, with normal or acne skin. All children were healthy with no underlying skin/medical conditions other than acne, if present. The menstrual cycle was not recorded for females. Information regarding use of oral contraceptives (OCPs), including brands and frequency, was not obtained and could not be assessed in this study. No subjects had a history of systemic retinoid use. Only subjects who verbally confirmed no oral antibiotic use within the past 4 weeks were enrolled. A chart review of the 12 months prior to study enrollment did not identify systemic or topical antibiotic exposure for any subject. Exclusion criteria included use of topical antibiotics, benzoyl peroxide, or salicylic washes within 2 weeks prior to the start of the study; and use of topical retinoids, dermabrasion or facial laser therapy within 4 weeks prior to the start of the study. No instructions on modifying or limiting each subject's regular hygiene practices (bathing, lotion use) prior to sampling were given and bathing frequency/timing prior to sampling were not documented. For each subject, we collected the following demographic and clinical data: 1) age, 2) sex, 3) race/ethnicity, 4) Tanner stage of pubertal development staged by a board-certified dermatologist,<sup>1,2</sup> 5) presence or absence of acne; if present, acne was staged by dermatologist on the indicated IGA scale,<sup>3</sup> 6) sebumeter readings and 7) presence or absence of lotions and makeup on the skin at sampling time. Demographics are provided in Supplemental Table S1.

**Cohort Characteristics** (a) by Tanner Stage, (b) by early and late Tanner groups

(a)

| Tanner Stage | 1         | 2        | 3        | 4        | 5         | Total     |
|--------------|-----------|----------|----------|----------|-----------|-----------|
| Normal       | 6         | 7        | 2        | 1        | 5         | 21        |
| Acne         | 6         | 2        | 6        | 7        | 6         | 27        |
| <b>Total</b> | <b>12</b> | <b>9</b> | <b>8</b> | <b>8</b> | <b>11</b> | <b>48</b> |
| Age Median   | 7.9       | 10.6     | 12       | 13.5     | 15.6      | 11.8      |
| (Range)      | (7-9)     | (7-14)   | (10-13)  | (12-16)  | (12-17)   | (7-17)    |

(b)

| Tanner Stage | Early<br>(T1-T2) | Late<br>(T3-T5) | Total     |
|--------------|------------------|-----------------|-----------|
| Normal       | 13               | 8               | 21        |
| Acne         | 8                | 19              | 27        |
| <b>Total</b> | <b>21</b>        | <b>27</b>       | <b>48</b> |
| Age Median   | 9.0              | 13.9            | 11.8      |
| (Range)      | (7-14)           | (10-17)         | (7-17)    |

**IGA Scale** Adapted from the FDA center for drug evaluation and research on acne vulgaris<sup>3</sup>

| Score | Grade        | Description                                                                                                                                                |
|-------|--------------|------------------------------------------------------------------------------------------------------------------------------------------------------------|
| 0     | Clear        | Normal, clear skin with no evidence of acne vulgaris                                                                                                       |
| 1     | Almost Clear | Rare non-inflammatory lesions may be present, with rare non-inflamed papules (papules must be resolving and may be hyperpigmented, though not pink-red)    |
| 2     | Mild         | Some non-inflammatory lesions are present, with few inflammatory lesions (papules/pustules only; no nodulocystic lesions)                                  |
| 3     | Moderate     | Many non-inflammatory lesions. Multiple inflammatory lesions evident with several to many papules/pustules, and there may be one small nodulocystic lesion |
| 4     | Severe       | Inflammatory lesions are more apparent, many comedones and papules/pustules, there may be a few nodulocystic lesions                                       |
| 5     | Very Severe  | Highly inflammatory lesions predominate, variable number of comedones, many papules/pustules and many nodulocystic lesions                                 |

## Tanner Stage Evaluation Form

Tanner staging was done according to Marshall and Tanner, using the criteria below.<sup>1,2</sup> The format and wording of this evaluation form was adopted by our group using descriptions of pubertal stages obtained from the original publications, The American Academy of Pediatrics, and WIKIPEDIA. Images were obtained from WIKIPEDIA.

### TANNER STAGE

| Genitals (male)          |            | <input type="checkbox"/> N/A                                                                                               |
|--------------------------|------------|----------------------------------------------------------------------------------------------------------------------------|
| <input type="checkbox"/> | Tanner I   | Testicular volume less than 1.5 ml; small penis of 3 cm or less (pre pubertal) (typically age nine and younger)            |
| <input type="checkbox"/> | Tanner II  | Testicular volume between 1.6 and 6 ml; skin on scrotum thins, reddens and enlarges; penis length unchanged (9-11)         |
| <input type="checkbox"/> | Tanner III | Testicular volume between 6 and 12 ml; scrotum enlarges further; penis begins to lengthen to about 6 cm (11-12.5)          |
| <input type="checkbox"/> | Tanner IV  | Testicular volume between 12 and 20 ml; scrotum enlarges further and darkens; penis increases in length to 10 cm (12.5-14) |
| <input type="checkbox"/> | Tanner V   | Testicular volume greater than 20 ml; adult scrotum and penis of 15 cm in length (14+)                                     |

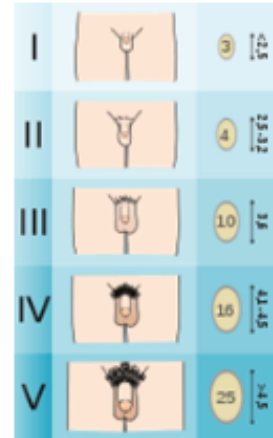

| Breasts (female)         |            | <input type="checkbox"/> N/A                                                                                                                                        |
|--------------------------|------------|---------------------------------------------------------------------------------------------------------------------------------------------------------------------|
| <input type="checkbox"/> | Tanner I   | No glandular tissue: areola follows the skin contours of the chest (pre pubertal) (typically age 10 and younger)                                                    |
| <input type="checkbox"/> | Tanner II  | Breast bud forms, with small area of surrounding glandular tissue; areola begins to widen (10-11.5)                                                                 |
| <input type="checkbox"/> | Tanner III | Breast begins to become more elevated, and extends beyond the borders of the areola, which continues to widen but remains in contour with surround breast (11.5-13) |
| <input type="checkbox"/> | Tanner IV  | Increased breast size and elevation; areola and papilla form a secondary mound projecting the contour of the surrounding breast (13-15)                             |
| <input type="checkbox"/> | Tanner V   | Breast reaches final adult size; areola return to contour of the surrounding breast, with a projecting central papilla. (15+)                                       |

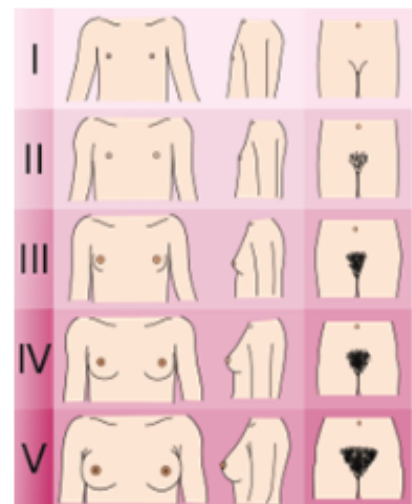

| Pubic hair (both male and female) |            |                                                                                                                                                   |
|-----------------------------------|------------|---------------------------------------------------------------------------------------------------------------------------------------------------|
| <input type="checkbox"/>          | Tanner I   | No pubic hair at all (pre pubertal)(typically age 10 and younger)                                                                                 |
| <input type="checkbox"/>          | Tanner II  | Small amount of long, downy hair with slight pigmentation at the base of the penis and scrotum (males) or on the labia majora (females) (10-11.5) |
| <input type="checkbox"/>          | Tanner III | Hair becomes more coarse and curly, and begins to extend laterally (11.5-13)                                                                      |
| <input type="checkbox"/>          | Tanner IV  | Adult-like hair quality, extending across pubis but sparing medial thighs (13-15)                                                                 |
| <input type="checkbox"/>          | Tanner V   | Hair extends to medial surface of the thighs (15+)                                                                                                |

## **Sebum Measurements**

The sebum output on the forehead of each subject was measured with the Sebumeter 810™ Instrument according to manufacturer directions. Sebumeter readings were captured prior to skin microbiome sampling. Briefly, single sebumeter readings were captured from the left, center and right regions of the forehead. These three readings for each individual were averaged together to calculate the overall sebum measurement for each subject.

## **Microbiome Sampling**

Sampling occurred within the Dermatology Clinical Research Unit at Penn State Health. Sterile synthetic fiber applicators (with plastic handle) were pre-moistened with yeast lysis buffer (Epicentre, Illumina). A 7 cm<sup>2</sup> area (using a plastic template) in the center of the forehead was scrubbed with moderate pressure for thirty seconds and placed in a sterile 1.5 mL tube containing 600 μL of yeast lysis buffer (Epicentre, Illumina). Both the sebum measurement and skin microbiome collection was done on the forehead and acne was present on the forehead in acne subjects. No washes or solutions were applied

to the forehead before sampling. Sebum measurements were collected first, using the Sebumeter 810 device. The probe surface area that touches the skin's surface is 64 mm<sup>2</sup>.

We sampled the sebum on the left, middle and right areas of the forehead (little circles in Diagram 1). We then sampled the microbiome from a 7 cm<sup>2</sup> (700 mm<sup>2</sup>) area of the middle

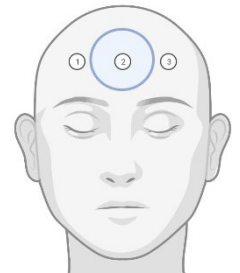

Diagram 1

forehead, which did overlap with one of the sebum measurement areas (larger blue circle in Diagram 1). In total, ~10% of the skin microbiome sampling area overlapped with the sebum measurement area; the majority of the sampling area was undisturbed prior to sampling. The swabs were immediately stored at -80 °C. For negative control sample, a sterile swab was removed from its packaging, held in the air for ~30 seconds to mimic the time that a swab is in contact with human skin, and placed into a sterile 1.5 mL tube containing 600 μL of yeast lysis buffer and stored at -80 °C with all samples. Mock community controls (MCC); generalized community control (ATCC MSA-1005) and skin-specific community control (ATCC MSA-1002), and negative

sampling controls (n=5) (e.g., sampling swabs without skin contact) were processed alongside samples from human subjects.

### **Metagenomic sequencing, processing, and taxonomic identification**

Frozen swab samples were shipped to Microbiome Insights (British Columbia, Canada) for DNA extraction, library preparation and sequencing. DNA was extracted using the Qiagen MagAttract PowerSoil DNA KF kit (Formerly MO Bio PowerSoil DNA Kit) using a KingFisher robot. DNA quality was evaluated by gel electrophoresis and quantified with Qubit 3.0 fluorometer (Thermo-Fischer, Waltham, MA, USA). Libraries were made following manufacturer protocols and Illumina Nextera library preparation kit (Illumina, San Diego, CA, USA). Sequencing was done using a high output Illumina Nestseq run (2x150 paired-end reads) which yielded 197.46 Gbases (median = 3.9 Gbases). Negative control 6 was added as a sequencing control.

Initial quality evaluation was done using FastQC (v0.11.5).<sup>4</sup> Raw sequences were processed for: adapter removal, read trimming, low-complexity-reads removal, and host-sequence removals. Adapter removal was done using cutadapt (v2.6).<sup>5</sup> Trimming was done with Trimmomatic (v0.36)<sup>6</sup> using custom parameters (LEADING:3 TRAILING:3 SLIDINGWINDOW:4:15 MINLEN:36). Low-complexity sequences were detected with Komplexity v0.3.6.<sup>7</sup> High-quality reads were mapped to the human genome (Genome Reference Consortium Human Reference 37) and those that mapped were removed from the analysis. After quality control, the remaining high-quality sequences were used for taxonomic profiles using MetaPhlan2,<sup>8</sup> consistent with prior studies.<sup>9</sup> The median number of high-quality filtered reads per sample was 2,840,816 (Table S3). Consistent with previous whole genome sequencing studies, samples with > 50,000 non-human quality controlled reads were included in our study.<sup>9,10</sup> Positive mock community controls (n=2), negative sampling controls (n=5), and a negative sequencing control (n=1) were analyzed in parallel with patient samples (Fig. S1).

## **Diversity Analyses and Statistics**

Relative abundance data was available for 332 species (308 bacteria, 22 viruses, 1 Eukaryota, and 1 Unclassified-group). Prior to statistical analysis, we eliminated 10 (3%) species which were only present in the positive controls and 101 (30.4%) species which were detected in a single sample with a relative abundance of less than 1% (Table S4). Furthermore, two *Escherichia* species were also dropped as they were detected in the negative controls at high levels and are likely contaminants. No species were detected in the negative sequencing control sample (NSC, Table S3). All further analysis was done with a microbiome community of the remaining 219 species (201 bacteria, 16 viruses, 1 Eukaryota, and 1 Unclassified-group). The Wilcoxon rank sum test was used to compare relative abundances and Shannon indices. The Bray-Curtis dissimilarity index is used to calculate beta diversities, which were compared using PERMANOVA (Permutational Multivariate Analysis of Variance).<sup>11</sup> Unless otherwise specified, the reported p-values are not adjusted for multiple testing. If adjusted for multiple testing, adjusted p-values are obtained using the Bonferroni correction. Viral sequences dominated 8 of 48 samples, but no significant association between viral relative abundance and demographic (age, sex, ethnicity) or clinical data (sebum levels, Tanner stage, IGA score) were found.

## C. acnes Strain Level Analysis

To identify and analyze the *C. acnes* strain composition in our dataset, we followed the pipeline illustrated and described here.

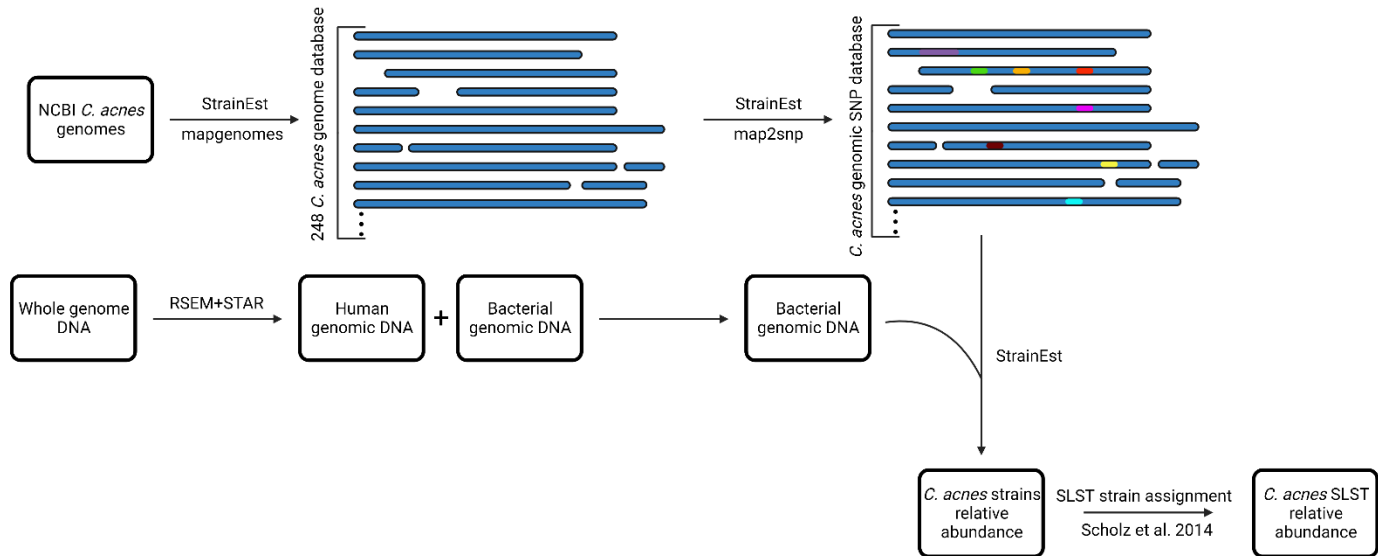

All publicly available *C. acnes* genomes (complete and draft) available at NCBI (<https://www.ncbi.nlm.nih.gov/genome/browse/#!/prokaryotes/1140/>) as of October 7<sup>th</sup> 2020 were downloaded to be utilized in the identification of *C. acnes* strains within our dataset. StrainEst (v1.2.4) was used to build an index of single nucleotide variants (SNV) present in the *C. acnes* strains (mapgenomes, map2snp).<sup>12</sup> A custom reference index of *C. acnes* SNV was built using Bowtie2 (v2.3.2.4) (bowtie-build). Our data was aligned against this custom reference index to identify each individual *C. acnes* strain with Bowtie2.<sup>13</sup> Samtools (v1.10.0)<sup>14</sup> was used to reformat the .sam output of Bowtie2 to a sorted and indexed .bam format compatible for use in StrainEst. Strains were identified using StrainEst (with filtered reads from sequence processing as previously described) default parameters, except 3X coverage for the *C. acnes* genome. A second custom *C. acnes* SNV reference index containing strains only identified in our samples was built. This was used with StrainEst to determine the relative abundance of each *C. acnes* strain per sample.

The single locus sequence typing (SLST) classification scheme was used to classify *C. acnes* strains.<sup>15</sup> Based on degree of homology, the SLST scheme uses a single locus to assign strains to a specific cluster (A-H,



K, L) and further subclassification to a nested strain group (e.g., A1, A2, B1, B2, etc.). To determine strain SLST classifications in this study, we performed a BLAST search of SLST sequence as determined by Scholz and colleagues<sup>15</sup> against the identified *C. acnes* strains in our dataset. We identified a total of 167 unique *C. acnes* strains in our dataset. 153 of 167 *C. acnes* strains were assigned to SLST clusters and SLST groups based on 100% homology to SLST sequences defined by the Scholz 2014 publication.<sup>15</sup> Eleven strains were only assigned to a specific cluster (A-H, K, L) based on 97-99% sequence homology to other strains within that cluster. By definition of the SLST scheme, even 1 SNP would constitute a different group, therefore, an identified strain must have a 100% homology for strain group assignment (for example, A1). Three unique strains could not be assigned to a specific strain cluster because they were less than 97% homologous; subsequently, we grouped these strains together in a single cluster, denoted X (unclassified). Corresponding *C. acnes* phlotypes are denoted next to SLST classification in brackets.<sup>16-18</sup>

We analyzed the relative abundance data according to SLST cluster for diversity analysis at both the cluster and group level.  $\alpha$ -diversity was calculated using the Shannon Index; comparisons between  $\alpha$ -diversity values were made using the Wilcoxon rank sum test. The Bray-Curtis dissimilarity index was used to calculate  $\beta$ -diversity values, which were compared using PERMANOVA.

### **Functional Profile Analysis**

For functional profile analyses filtered data as described above was used. Filtered data was further processed to remove rRNA reads from the dataset using SortMeRNA (v4.1.0)<sup>19</sup> utilizing all of its available databases before functional analysis. Paired-end and remaining singleton reads for each sample were then concatenated into a single input per sample for the HUMAnN2 (v2.8.1) analysis package.<sup>20</sup> Data was then analyzed in HUMAnN2 using its default analysis pipeline. As *E. coli* had been identified as a potential contaminant in our negative control samples, all reads associated with *E. coli* were removed from the data. All reads within a given functional classification was then grouped together regardless of the species associated with the read and converted from UniRef to KEGG Orthology (KO) terms using a function in

HUMAnN2(humann2\_regroup\_table -g uniref90\_ko). 7,134 KO terms were then used as input into MicrobiomeAnalyst on October 16<sup>th</sup> 2020.<sup>21</sup> Using its default filtering parameters for low counts and low variance 2,562 KOs were removed. 4,572 KEGG orthology enzymes underwent univariate analysis and pathway enrichment analysis. FDR was set at  $q=0.05$  to identify enzymes and pathways of biological interest.

## Supplemental Tables

**Table S1: Patient demographics and metadata**

| ID  | Age (yrs) | Sex | Ethnicity | Hispanic/Latino (Y/N) | Tanner Stage | Acne or Normal | IGA Score | Sebumeter (mean) | Lotion (Y/N) | Make-up (Y/N) |
|-----|-----------|-----|-----------|-----------------------|--------------|----------------|-----------|------------------|--------------|---------------|
| S01 | 12        | F   | White     | Y                     | 4            | Normal         | n/a       | 112.67           | N            | N             |
| S02 | 12        | F   | Hispanic  | Y                     | 4            | Acne           | 3         | 57.67            | N            | N             |
| S03 | 14        | F   | Black     | N                     | 4            | Acne           | 2         | 107.00           | N            | N             |
| S04 | 10        | M   | White     | Y                     | 2            | Normal         | n/a       | 9.67             | N            | N             |
| S05 | 17        | F   | White     | N                     | 5            | Acne           | 3         | 129.33           | N            | N             |
| S06 | 7         | F   | White     | N                     | 1            | Normal         | n/a       | 3.33             | N            | N             |
| S07 | 10        | F   | White     | N                     | 3            | Acne           | 1         | 30.00            | N            | N             |
| S08 | 7         | M   | White     | N                     | 1            | Normal         | n/a       | 1.33             | N            | N             |
| S09 | 17        | F   | Asian     | N                     | 5            | Acne           | 1         | 55.33            | N            | N             |
| S10 | 8         | M   | Egyptian  | Y                     | 1            | Normal         | n/a       | 8.67             | N            | N             |
| S11 | 12        | F   | Egyptian  | N                     | 3            | Acne           | 3         | 77.33            | N            | N             |
| S12 | 15        | M   | White     | Y                     | 5            | Acne           | 3         | 54.67            | N            | N             |
| S13 | 7         | F   | Black     | N                     | 2            | Normal         | n/a       | 28.33            | Y            | N             |
| S14 | 17        | F   | Asian     | N                     | 5            | Acne           | 1         | 29.67            | Y            | N             |
| S15 | 13        | M   | White     | N                     | 4            | Acne           | 2         | 82.33            | N            | N             |
| S16 | 12        | F   | White     | N                     | 3            | Acne           | 2         | 88.67            | N            | N             |
| S17 | 13        | M   | Hispanic  | Y                     | 4            | Acne           | 2         | 31.33            | N            | N             |
| S18 | 14        | F   | Asian     | N                     | 2            | Normal         | n/a       | 34.33            | Y            | N             |
| S19 | 8         | M   | White     | Y                     | 1            | Normal         | n/a       | 6.33             | N            | N             |
| S20 | 14        | M   | Dominican | Y                     | 4            | Acne           | 3         | 50.67            | N            | N             |
| S21 | 12        | F   | Black     | N                     | 3            | Normal         | n/a       | 40.33            | N            | N             |
| S22 | 12        | F   | White     | N                     | 5            | Acne           | 3         | 90.00            | N            | N             |
| S23 | 8         | M   | White     | N                     | 1            | Normal         | n/a       | 0.00             | N            | N             |
| S24 | 14        | M   | White     | N                     | 4            | Acne           | 3         | 99.00            | N            | N             |
| S25 | 8         | M   | White     | N                     | 1            | Acne           | 1         | 23.00            | N            | N             |
| S26 | 12        | M   | Black     | N                     | 3            | Acne           | 2         | 45.00            | N            | N             |
| S27 | 16        | M   | White     | Y                     | 5            | Normal         | n/a       | 53.67            | N            | N             |
| S28 | 11        | M   | White     | Y                     | 2            | Acne           | 1         | 4.33             | N            | N             |
| S29 | 9         | M   | Black     | N                     | 1            | Acne           | 1         | 131.00           | N            | N             |
| S30 | 13        | F   | White     | N                     | 3            | Acne           | 2         | 115.67           | Y            | N             |
| S31 | 9         | F   | Black     | N                     | 1            | Acne           | 1         | 45.67            | N            | N             |
| S32 | 8         | M   | Black     | N                     | 1            | Acne           | 1         | 13.00            | N            | N             |
| S33 | 10        | F   | White     | N                     | 2            | Acne           | 2         | 28.00            | N            | N             |
| S34 | 8         | F   | White     | N                     | 1            | Acne           | 1         | 32.33            | N            | N             |
| S35 | 13        | F   | White     | N                     | 3            | Acne           | 3         | 58.00            | Y            | N             |
| S36 | 11        | M   | White     | N                     | 2            | Normal         | n/a       | 1.67             | N            | N             |
| S37 | 16        | F   | White     | N                     | 4            | Acne           | 2         | 40.00            | N            | N             |
| S38 | 16        | F   | White     | N                     | 5            | Acne           | 2         | 36.67            | N            | N             |
| S39 | 10        | M   | Asian     | N                     | 2            | Normal         | n/a       | 42.00            | N            | N             |
| S40 | 7         | M   | White     | N                     | 1            | Acne           | 1         | 3.67             | N            | N             |
| S41 | 15        | F   | Asian     | N                     | 5            | Normal         | n/a       | 69.00            | Y            | Y             |
| S42 | 12        | M   | White     | N                     | 2            | Normal         | n/a       | 4.67             | N            | N             |
| S43 | 8         | F   | White     | N                     | 1            | Normal         | n/a       | 0.00             | N            | N             |
| S44 | 10        | F   | White     | N                     | 2            | Normal         | n/a       | 12.33            | N            | N             |
| S45 | 14        | M   | White     | N                     | 5            | Normal         | n/a       | 53.33            | N            | N             |
| S46 | 12        | F   | White     | N                     | 3            | Normal         | n/a       | 51               | N            | N             |
| S47 | 16        | F   | White     | N                     | 5            | Normal         | n/a       | 180.67           | Y            | N             |
| S48 | 17        | F   | White     | N                     | 5            | Normal         | n/a       | 149              | Y            | N             |

**Table S2: Summary statistics for covariates**

|                                 | <i>N=48</i> |
|---------------------------------|-------------|
| Age, Mean (SD)**                | 11.8 (3.11) |
| Sex, N (%):**                   |             |
| F                               | 27 (56.2%)  |
| M                               | 21 (43.8%)  |
| Ethnicity, N (%):               |             |
| Hispanic or Latino              | 10 (20.8%)  |
| Not Hispanic or Latino          | 38 (79.2%)  |
| Race, N (%):                    |             |
| Asian                           | 5 (10.4%)   |
| Black/African American          | 7 (14.6%)   |
| Dominican*                      | 1 (2.08%)   |
| Egyptian*                       | 2 (4.17%)   |
| Hispanic*                       | 2 (4.17%)   |
| White                           | 31 (64.6%)  |
| Tanner Stage (Tanner), N (%):   |             |
| 1                               | 12 (25.0%)  |
| 2                               | 9 (18.8%)   |
| 3                               | 8 (16.7%)   |
| 4                               | 8 (16.7%)   |
| 5                               | 11 (22.9%)  |
| Acne or Normal (Status), N (%): |             |
| Acne                            | 27 (56.2%)  |
| Normal                          | 21 (43.8%)  |
| IGA, N (%):                     |             |
| 1                               | 10 (20.8%)  |
| 2                               | 9 (18.8%)   |
| 3                               | 8 (16.7%)   |
| n/a                             | 21 (43.8%)  |
| Sebum, Mean (SD)                | 50.5 (43.5) |
| Lotion, N (%):                  |             |
| N                               | 40 (83.3%)  |
| Y                               | 8 (16.7%)   |
| Makeup, N (%):                  |             |
| N                               | 47 (97.9%)  |
| Y                               | 1 (2.08%)   |

\*Due to low frequencies, Dominican, Hispanic, and Egyptian have been combined into a single category in association analysis. Reported in Figure 2C of the main text.

\*\*There is no statistical difference in age ( $p = 0.212$ ) and sex ( $p = 0.771$ ) between normal and acne subjects.

**Table S3: Total number of quality reads.**

| Subject | Total reads | Non-human quality controlled reads | Average PHRED score | Subject     | Total reads | Non-human quality controlled reads | Average PHRED score |
|---------|-------------|------------------------------------|---------------------|-------------|-------------|------------------------------------|---------------------|
| S01     | 43,351,062  | 515,468                            | 33.94               | S29         | 16,015,446  | 1,985,180                          | 32.79               |
| S02     | 23,586,832  | 73,364                             | 33.86               | S30         | 33,989,198  | 1,857,776                          | 34.02               |
| S03     | 43,820,318  | 2,534,836                          | 33.92               | S31         | 22,595,618  | 124,416                            | 33.95               |
| S04     | 33,209,234  | 792,602                            | 34.05               | S32         | 31,948,270  | 2,833,916                          | 34.03               |
| S05     | 22,164,074  | 58,202                             | 33.83               | S33         | 35,945,874  | 9,778,772                          | 34.09               |
| S06     | 35,276,514  | 1,036,098                          | 33.87               | S34         | 31,778,862  | 4,642,038                          | 34.09               |
| S07     | 35,797,380  | 6,794,592                          | 34.06               | S35         | 30,829,244  | 7,584,492                          | 33.93               |
| S08     | 45,548,600  | 915,714                            | 33.99               | S36         | 30,870,460  | 5,980,952                          | 34.12               |
| S09     | 22,819,428  | 418,528                            | 34.07               | S37         | 32,888,394  | 4,739,262                          | 34.07               |
| S10     | 22,115,734  | 3,183,802                          | 34.11               | S38         | 32,075,012  | 9,830,498                          | 34.04               |
| S11     | 25,127,610  | 6,010,934                          | 33.96               | S39         | 29,965,254  | 2,700,704                          | 34.04               |
| S12     | 23,877,084  | 2,930,414                          | 33.98               | S40         | 36,105,820  | 432,632                            | 33.99               |
| S13     | 22,796,170  | 3,574,582                          | 34.04               | S41         | 32,371,298  | 392,540                            | 34.02               |
| S14     | 25,257,700  | 8,643,988                          | 33.95               | S42         | 32,622,664  | 3,808,152                          | 34.03               |
| S15     | 22,658,912  | 1,553,638                          | 34.03               | S43         | 41,733,306  | 998,522                            | 33.98               |
| S16     | 31,396,046  | 4,817,976                          | 33.94               | S44         | 38,258,514  | 1,179,840                          | 33.99               |
| S17     | 35,949,892  | 787,406                            | 34                  | S45         | 29,999,928  | 1,717,440                          | 33.95               |
| S18     | 36,121,656  | 2,933,596                          | 34.06               | S46         | 34,914,058  | 1,444,546                          | 33.97               |
| S19     | 39,820,732  | 2,709,100                          | 34.02               | S47         | 38,215,518  | 777,366                            | 33.96               |
| S20     | 38,657,384  | 5,979,350                          | 34.01               | S48         | 41,378,916  | 381,920                            | 33.9                |
| S21     | 34,844,518  | 1,903,112                          | 34.03               | MCC MSA1002 | 24,934,686  | 22,405,522                         | 34.03               |
| S22     | 32,524,150  | 2,796,734                          | 33.97               | MCC MSA1005 | 18,843,196  | 16,675,032                         | 33.95               |
| S23     | 33,762,522  | 1,550,054                          | 34.03               | NC 1        | 1,499,874   | 1,393,780                          | 34.14               |
| S24     | 31,679,492  | 4,144,590                          | 33.95               | NC 2        | 4,393,326   | 4,078,798                          | 34.16               |
| S25     | 32,955,376  | 3,628,742                          | 34.05               | NC 3        | 4,265,224   | 4,023,998                          | 34.1                |
| S26     | 27,908,660  | 798,702                            | 34.08               | NC 4        | 4,461,482   | 4,190,042                          | 34.14               |
| S27     | 29,172,440  | 385,468                            | 33.89               | NC 5        | 5,426,748   | 5,051,296                          | 34.14               |
| S28     | 23,865,108  | 1,696,590                          | 34.08               | NSC         | 38,046      | 7,890                              | 33.93               |

\*PHRED score represents the quality of the sequencing run. A score of 30 represents a base accuracy of 99.9% or the probability of an incorrect base is 1 in 1,000. A score of 40 is 99.99% accurate (1 in 10,000 chance).<sup>22,23</sup>

MCC = Mock Community Control, NC = Negative Control, NSC = Negative Sequencing Control

**Table S4: 101 species removed before analyses.** Prior to analyses, we removed species that were present in positive controls (10 species) or those only detected within a single patient sample (101 species; <1% relative abundance). Negative sampling controls contained >90% *Escherichia*; thus, sequences corresponding to *Escherichia* were removed from all samples before analysis (Fig. S1c, Supplemental Methods). All further analyses were done with the remaining 219 species: 201 bacteria, 16 viruses, 1 Eukaryota, and 1 unclassified group. Thus, all species that were removed following the criteria above are listed in the table below. Propioni. - *Propionibacterium*, Staph. - *Staphylococcus*, Strep. - *Streptococcus*. un. – unclassified.

| Kingdom                        | Species                                      |                                       |                                    |
|--------------------------------|----------------------------------------------|---------------------------------------|------------------------------------|
| Viruses                        | <i>Feline leukemia virus</i>                 | <i>Propioni. phage P14 4</i>          | <i>Staph. phage 80alpha</i>        |
|                                | <i>Mupapillomavirus 1</i>                    | <i>RD114 retrovirus</i>               | <i>Strep. pyogenes phage 315 6</i> |
| Bacteria                       | <i>Acinetobacter bereziniae</i>              | <i>Delftia un.</i>                    | <i>Neisseria subflava</i>          |
|                                | <i>Acinetobacter guillouiae</i>              | <i>Dermacoccus sp Ellin185</i>        | <i>Oligella urethralis</i>         |
|                                | <i>Acinetobacter gyllenbergii</i>            | <i>Dialister micraerophilus</i>       | <i>Oribacterium sinus</i>          |
|                                | <i>Actinobaculum urinale</i>                 | <i>Dorea longicatena</i>              | <i>Paracoccus denitrificans</i>    |
|                                | <i>Aggregatibacter aphrophilus</i>           | <i>Eikenella corrodens</i>            | <i>Parvimonas micra</i>            |
|                                | <i>Agrobacterium unclassified</i>            | <i>Empedobacter brevis</i>            | <i>Parvimonas un.</i>              |
|                                | <i>Agromyces unclassified</i>                | <i>Enterobacter aerogenes</i>         | <i>Peptoniphilus rhinitidis</i>    |
|                                | <i>Akkermansia muciniphila</i>               | <i>Eubacterium bifforme</i>           | <i>Peptostreptococcus stomatis</i> |
|                                | <i>Alistipes unclassified</i>                | <i>Eubacterium brachy</i>             | <i>Porphyromonas gingivalis</i>    |
|                                | <i>Bacteroides uniformis</i>                 | <i>Eubacterium siraeum</i>            | <i>Porphyromonas gulae</i>         |
|                                | <i>Bacteroides vulgatus</i>                  | <i>Halomonas stevensii</i>            | <i>Porphyromonas uenonis</i>       |
|                                | <i>Bergeyella zoohelcum</i>                  | <i>Halomonas un.</i>                  | <i>Prevotella bivia</i>            |
|                                | <i>Bifidobacterium angulatum</i>             | <i>Hymenobacter un.</i>               | <i>Prevotella copri</i>            |
|                                | <i>Bifidobacterium animalis</i>              | <i>Jonquetella anthropi</i>           | <i>Prevotella maculosa</i>         |
|                                | <i>Bifidobacterium pseudocatenulatum</i>     | <i>Kingella oralis</i>                | <i>Prevotella saccharolytica</i>   |
|                                | <i>Brachybacterium paraconglomeratum</i>     | <i>Lachnospiraceae bacterium ICM7</i> | <i>Propionibacterium avidum</i>    |
|                                | <i>Brevibacterium mcbrellneri</i>            | <i>Lachnospiraceae oral taxon 107</i> | <i>Pseudomonas tolaasii</i>        |
|                                | <i>Campylobacter concisus</i>                | <i>Lactobacillus acidophilus</i>      | <i>Rickettsia felis</i>            |
|                                | <i>Candidatus Prevotella conceptionensis</i> | <i>Lactobacillus casei paracasei</i>  | <i>Rickettsia parkeri</i>          |
|                                | <i>Capnocytophaga granulosa</i>              | <i>Lactobacillus gasseri</i>          | <i>Roseburia un.</i>               |
|                                | <i>Caulobacter vibrioides</i>                | <i>Lactobacillus rhamnosus</i>        | <i>Ruminococcus obeum</i>          |
|                                | <i>Clostridium nexile</i>                    | <i>Lactobacillus vaginalis</i>        | <i>Scardovia wiggisiae</i>         |
|                                | <i>Collinsella aerofaciens</i>               | <i>Leptotrichia goodfellowii</i>      | <i>Selenomonas flueggei</i>        |
|                                | <i>Coriobacteriaceae bacterium BV3Ac1</i>    | <i>Leptotrichia hofstadii</i>         | <i>Sphingobacterium un.</i>        |
|                                | <i>Corynebacterium amycolatum</i>            | <i>Leuconostoc carnosum</i>           | <i>Sphingobium un.</i>             |
|                                | <i>Corynebacterium aurimucosum</i>           | <i>Leuconostoc lactis</i>             | <i>Staph. equorum</i>              |
|                                | <i>Corynebacterium bovis</i>                 | <i>Massilia un.</i>                   | <i>Strep. equi</i>                 |
|                                | <i>Corynebacterium jeikeium</i>              | <i>Mitsuokella un.</i>                | <i>Strep. oligofermentans</i>      |
|                                | <i>Corynebacterium massiliense</i>           | <i>Mobiluncus un.</i>                 | <i>Strep. pyogenes</i>             |
|                                | <i>Corynebacterium urealyticum</i>           | <i>Moraxella catarrhalis</i>          | <i>Variovorax un.</i>              |
| <i>Deinococcus radiodurans</i> | <i>Neisseria gonorrhoeae</i>                 | <i>Xanthomonas citri</i>              |                                    |
| <i>Delftia acidovorans</i>     | <i>Neisseria polysaccharea</i>               |                                       |                                    |

**Table S5: Top 20 most abundant species.**

| Kingdom      | Species                                      | Abundance Percentage |
|--------------|----------------------------------------------|----------------------|
| Bacteria     | <i>Cutibacterium acnes</i>                   | 40.65                |
| Eukaryota    | <i>Malassezia globosa</i>                    | 4.35                 |
| Viruses      | <i>Betapapillomavirus 3</i>                  | 4.18                 |
| Bacteria     | <i>Staphylococcus epidermidis</i>            | 3.92                 |
| Unclassified | Unclassified                                 | 3.51                 |
| Bacteria     | <i>Streptococcus mitis oralis pneumoniae</i> | 3.42                 |
| Viruses      | <i>Human papillomavirus 161 like viruses</i> | 3.15                 |
| Viruses      | <i>Betapapillomavirus 1</i>                  | 3.06                 |
| Viruses      | <i>Betapapillomavirus 5</i>                  | 2.26                 |
| Viruses      | <i>Propionibacterium phage P101A</i>         | 2.23                 |
| Viruses      | <i>Polyomavirus HPyV6</i>                    | 1.71                 |
| Bacteria     | <i>Enhydrobacter aerosaccus</i>              | 1.54                 |
| Bacteria     | <i>Streptococcus thermophilus</i>            | 1.19                 |
| Bacteria     | <i>Neisseria unclassified</i>                | 1.06                 |
| Bacteria     | <i>Haemophilus parainfluenzae</i>            | 0.99                 |
| Bacteria     | <i>Streptococcus sanguinis</i>               | 0.97                 |
| Bacteria     | <i>Staphylococcus caprae capitis</i>         | 0.97                 |
| Bacteria     | <i>Haemophilus influenzae</i>                | 0.92                 |
| Bacteria     | <i>Gemella haemolysans</i>                   | 0.79                 |
| Bacteria     | <i>Rothia mucilaginosa</i>                   | 0.77                 |

**Table S6: Top 20 most abundant species within Tanner stages 1-2.**

| Kingdom      | Species                                        | Abundance Percentage |
|--------------|------------------------------------------------|----------------------|
| Bacteria     | <i>Cutibacterium acnes</i> *                   | 21.95                |
| Eukaryota    | <i>Malassezia globosa</i> *                    | 8.85                 |
| Viruses      | <i>Betapapillomavirus 5</i> *                  | 5.18                 |
| Viruses      | <i>Betapapillomavirus 3</i> *                  | 4.86                 |
| Bacteria     | <i>Streptococcus mitis oralis pneumoniae</i> * | 4.39                 |
| Unclassified | Unclassified*                                  | 2.99                 |
| Viruses      | <i>Human papillomavirus 161 like viruses</i> * | 2.61                 |
| Bacteria     | <i>Staphylococcus epidermidis</i> *            | 2.58                 |
| Viruses      | <i>Betapapillomavirus 1</i> *                  | 2.16                 |
| Bacteria     | <i>Haemophilus influenza</i> *                 | 2.07                 |
| Bacteria     | <i>Neisseria unclassified</i> *                | 1.92                 |
| Bacteria     | <i>Streptococcus sanguinis</i> *               | 1.74                 |
| Bacteria     | <i>Haemophilus parainfluenzae</i> *            | 1.69                 |
| Bacteria     | <i>Rothia mucilaginosa</i> *                   | 1.53                 |
| Bacteria     | <i>Gemella haemolysans</i> *                   | 1.36                 |
| Viruses      | <i>Streptococcus phage EJ 1</i>                | 1.11                 |
| Bacteria     | <i>Granulicatella elegans</i>                  | 1.06                 |
| Bacteria     | <i>Corynebacterium kroppenstedtii</i>          | 1.06                 |
| Bacteria     | <i>Staphylococcus hominis</i>                  | 1.06                 |
| Viruses      | <i>Alphapapillomavirus 4</i>                   | 1.04                 |

\* Present in Supplemental Table S5

**Table S7: Top 20 most abundant species within Tanner stages 3-5.**

| <b>Kingdom</b> | <b>Species</b>                                 | <b>Abundance Percentage</b> |
|----------------|------------------------------------------------|-----------------------------|
| Bacteria       | <i>Cutibacterium acnes</i> *                   | 55.19                       |
| Bacteria       | <i>Staphylococcus epidermidis</i> *            | 4.95                        |
| Unclassified   | Unclassified*                                  | 3.91                        |
| Viruses        | <i>Propionibacterium phage P101A</i> *         | 3.88                        |
| Viruses        | <i>Betapapillomavirus 1</i> *                  | 3.77                        |
| Viruses        | <i>Betapapillomavirus 3</i> *                  | 3.65                        |
| Viruses        | <i>Human papillomavirus 161 like viruses</i> * | 3.57                        |
| Viruses        | <i>Polyomavirus HPyV6</i> *                    | 3.05                        |
| Bacteria       | <i>Streptococcus mitis oralis pneumoniae</i> * | 2.66                        |
| Bacteria       | <i>Enhydrobacter aerosaccus</i> *              | 2.19                        |
| Bacteria       | <i>Streptococcus thermophiles</i> *            | 1.43                        |
| Bacteria       | <i>Staphylococcus caprae capitis</i> *         | 1.17                        |
| Viruses        | <i>Propionibacterium phage P100D</i>           | 0.86                        |
| Eukaryota      | <i>Malassezia globosa</i> *                    | 0.85                        |
| Viruses        | <i>Alphapapillomavirus 2</i>                   | 0.81                        |
| Bacteria       | <i>Haemophilus parainfluenzae</i> *            | 0.45                        |
| Viruses        | <i>Avian endogenous retrovirus EAV HP</i>      | 0.43                        |
| Bacteria       | <i>Neisseria unclassified</i>                  | 0.4                         |
| Bacteria       | <i>Streptococcus sanguinis</i> *               | 0.37                        |
| Bacteria       | <i>Lactobacillus iners</i>                     | 0.35                        |

\* Present in Supplemental Table S5



**Table S8: 45 species (37 bacteria, 8 viruses) present only on normal skin.**

| Kingdom  | Species                                 | Abundance (%) | Prevalence (%) |
|----------|-----------------------------------------|---------------|----------------|
| Bacteria | <i>Neisseria flavescens</i>             | 0.3686        | 12.5           |
| Bacteria | <i>Porphyromonas sp oral taxon 279</i>  | 0.0895        | 2.08           |
| Bacteria | <i>Capnocytophaga sp oral taxon 329</i> | 0.0613        | 2.08           |
| Bacteria | <i>Kingella denitrificans</i>           | 0.0506        | 4.17           |
| Bacteria | <i>Campylobacter showae</i>             | 0.0189        | 4.17           |
| Bacteria | <i>Haemophilus paraphrohaemolyticus</i> | 0.0232        | 4.17           |
| Bacteria | <i>Cardiobacterium hominis</i>          | 0.0056        | 4.17           |
| Bacteria | <i>Streptococcus anginosus</i>          | 0.0151        | 6.25           |
| Bacteria | <i>Actinomyces graevenitzii</i>         | 0.0028        | 4.17           |
| Bacteria | <i>Megasphaera micronuciformis</i>      | 0.0038        | 4.17           |
| Bacteria | <i>Atopobium parvulum</i>               | 0.0069        | 6.25           |
| Bacteria | <i>Prevotella denticola</i>             | 0.0023        | 4.17           |
| Bacteria | <i>Capnocytophaga ochracea</i>          | 0.0027        | 4.17           |
| Bacteria | <i>Kytococcus sedentarius</i>           | 0.0338        | 2.08           |
| Bacteria | <i>Brevundimonas diminuta</i>           | 0.0346        | 4.17           |
| Bacteria | <i>Peptoniphilus lacrimalis</i>         | 0.0445        | 6.25           |
| Bacteria | <i>Pantoea ananatis</i>                 | 0.0087        | 4.17           |
| Bacteria | <i>Enterobacter cloacae</i>             | 0.0054        | 8.33           |
| Viruses  | <i>Streptococcus phage EJ 1</i>         | 0.4860        | 4.17           |
| Bacteria | <i>Peptoniphilus harei</i>              | 0.1258        | 10.42          |
| Bacteria | <i>Anaerococcus hydrogenalis</i>        | 0.0344        | 6.25           |
| Bacteria | <i>Porphyromonas asaccharolytica</i>    | 0.0123        | 4.17           |
| Bacteria | <i>Facklamia hominis</i>                | 0.0285        | 4.17           |
| Bacteria | <i>Prevotella buccalis</i>              | 0.0091        | 4.17           |
| Bacteria | <i>Actinomyces turicensis</i>           | 0.0077        | 4.17           |
| Bacteria | <i>Anaerococcus lactolyticus</i>        | 0.0109        | 4.17           |
| Bacteria | <i>Campylobacter ureolyticus</i>        | 0.0030        | 4.17           |
| Bacteria | <i>Anaerococcus obesiensis</i>          | 0.0085        | 6.25           |
| Bacteria | <i>Campylobacter hominis</i>            | 0.0030        | 4.17           |
| Bacteria | <i>Prevotella pallens</i>               | 0.0078        | 4.17           |
| Bacteria | <i>Atopobium rimae</i>                  | 0.0074        | 4.17           |
| Bacteria | <i>Peptoniphilus duerdenii</i>          | 0.0097        | 4.17           |
| Bacteria | <i>Peptostreptococcus unclassified</i>  | 0.0012        | 4.17           |
| Viruses  | <i>Enterobacteria phage HK633</i>       | 0.0516        | 2.08           |
| Bacteria | <i>Veillonella sp oral taxon 780</i>    | 0.0310        | 2.08           |
| Bacteria | <i>Dialister invisus</i>                | 0.0024        | 4.17           |
| Viruses  | <i>Alphapapillomavirus 4</i>            | 0.4547        | 2.08           |
| Viruses  | <i>Betapapillomavirus 3</i>             | 4.1791        | 8.33           |
| Bacteria | <i>Ruminococcus torques</i>             | 0.0193        | 4.17           |
| Bacteria | <i>Acinetobacter oleivorans</i>         | 0.0739        | 2.08           |
| Bacteria | <i>Pedobacter unclassified</i>          | 0.0024        | 4.17           |
| Viruses  | <i>Betapapillomavirus 5</i>             | 2.2642        | 4.17           |
| Viruses  | <i>Alphapapillomavirus 2</i>            | 0.4567        | 2.08           |
| Viruses  | <i>Staphylococcus phage phiETA3</i>     | 0.0967        | 2.08           |
| Viruses  | <i>Staphylococcus phage phi2958PVL</i>  | 0.0791        | 2.08           |

**Table S9: 16 species (14 bacteria, 2 viruses) present only on acne skin.**

| Kingdom  | Species                              | Abundance (%) | Prevalence (%) |
|----------|--------------------------------------|---------------|----------------|
| Bacteria | <i>Staphylococcus haemolyticus</i>   | 0.0035        | 6.25           |
| Bacteria | <i>Propionibacterium sp KPL1844</i>  | 0.0609        | 2.08           |
| Bacteria | <i>Acinetobacter baumannii</i>       | 0.0023        | 4.17           |
| Bacteria | <i>Pseudonocardia unclassified</i>   | 0.0050        | 4.17           |
| Viruses  | <i>Polyomavirus HPyV6</i>            | 1.7150        | 2.08           |
| Bacteria | <i>Roseomonas unclassified</i>       | 0.0117        | 4.17           |
| Bacteria | <i>Atopobium vaginae</i>             | 0.1417        | 6.25           |
| Bacteria | <i>Prevotella amnii</i>              | 0.0346        | 4.17           |
| Bacteria | <i>Gordonia terrae</i>               | 0.0034        | 8.33           |
| Bacteria | <i>Actinomyces neuii</i>             | 0.0054        | 4.17           |
| Bacteria | <i>Faecalibacterium prausnitzii</i>  | 0.0918        | 2.08           |
| Bacteria | <i>Eubacterium rectale</i>           | 0.0876        | 4.17           |
| Bacteria | <i>Staphylococcus lugdunensis</i>    | 0.1010        | 4.17           |
| Bacteria | <i>Streptococcus vestibularis</i>    | 0.0095        | 4.17           |
| Bacteria | <i>Megasphaera genomosp type 1</i>   | 0.0066        | 4.17           |
| Viruses  | <i>Propionibacterium phage PI00D</i> | 0.4811        | 6.25           |

**Table S10: Frequency distribution of strains within the SLST clusters.**

| SLST cluster     | Phylotype*      | No. of strains identified in SLST cluster |
|------------------|-----------------|-------------------------------------------|
| A                | IA <sub>1</sub> | 58                                        |
| B                | IA <sub>1</sub> | 2                                         |
| C                | IA <sub>1</sub> | 18                                        |
| D                | IA <sub>1</sub> | 8                                         |
| E                | IA <sub>1</sub> | 6                                         |
| F                | IA <sub>2</sub> | 25                                        |
| G                | IC              | 6                                         |
| H                | IB              | 20                                        |
| K                | II              | 15                                        |
| L                | III             | 6                                         |
| X (unclassified) |                 | 3                                         |
| Sum              |                 | 167                                       |

\*Corresponding *C. acnes* phylotypes as identified in the literature.<sup>16-18</sup>

**Table S11: *C. acnes* strains present in this study.** SLST and Phylotype classifications for each strain, based on homology to sequenced strains.

| Strain   | SLST Assigned | SLST Group | Phylotype Assigned | Strain                  | SLST Assigned | SLST Group | Phylotype Assigned |
|----------|---------------|------------|--------------------|-------------------------|---------------|------------|--------------------|
| SK137    | C1            | C          | IA                 | 523_PAVI                | G1            | G          | IC                 |
| HL002PA1 | F1            | F          | IA                 | KCOM 1861 (= ChDC B594) | K2            | K          | II                 |
| HL067PA1 | F2            | F          | IA                 | PMH5                    | L1            | L          | III                |
| HL005PA4 | F1            | F          | IA                 | PMH7                    | L1            | L          | III                |
| HL002PA2 | A2            | A          | IA                 | PA_30_2_L1              | 98.35% F1     | F          | IA                 |
| HL025PA2 | F1            | F          | IA                 | PA_15_1_R1              | C1            | C          | IA                 |
| HL053PA1 | C2            | C          | IA                 | PA_21_1_L1              | H1            | H          | IB                 |
| HL110PA1 | E1            | E          | IA                 | PA_15_2_L1              | A1            | A          | IA                 |
| HL083PA1 | C1            | C          | IA                 | PA_12_1_R1              | 99.17% F1     | F          | IA                 |
| HL072PA1 | A6            | A          | IA                 | PA_12_1_L1              | A1            | A          | IA                 |
| HL050PA1 | 99.79% F2, F7 | F          | IA                 | 50.1.L1                 | A1            | A          | IA                 |
| HL046PA1 | F1            | F          | IA                 | 51.1.L1                 | A3            | A          | IA                 |
| HL005PA1 | C2            | C          | IA                 | 52.1.L4                 | A1            | A          | IA                 |
| HL050PA3 | F1            | F          | IA                 | 48.1.L1                 | A1            | A          | IA                 |
| HL005PA3 | A1            | A          | IA                 | 49.1.L1                 | A1            | A          | IA                 |
| HL045PA1 | C2            | C          | IA                 | 32.1.L2                 | A1            | A          | IA                 |
| HL005PA2 | A1            | A          | IA                 | 46.1.L1                 | A1            | A          | IA                 |
| HL086PA1 | E4            | E          | IA                 | 43.1.L1                 | A1            | A          | IA                 |
| HL038PA1 | C1            | C          | IA                 | 37.1.L1                 | A1            | A          | IA                 |
| HL050PA2 | K4            | K          | II                 | 44.1.L1                 | A1            | A          | IA                 |
| HL087PA3 | F1            | F          | IA                 | NTS_2003_1719           | D1            | D          | IA                 |
| HL020PA1 | A1            | A          | IA                 | LRY_BL                  | H1            | H          | IB                 |
| HL013PA2 | A1            | A          | IA                 | NTS_2004_10708          | A26           | A          | IA                 |
| HL063PA1 | A1            | A          | IA                 | NTS_31306190            | A1            | A          | IA                 |
| HL036PA1 | A2            | A          | IA                 | UBA1564                 | 99.59% D1     | D          | IA                 |
| HL036PA2 | A2            | A          | IA                 | UBA3960                 | A5            | A          | IA                 |
| HL027PA2 | A1            | A          | IA                 | Dec-89                  | A1            | A          | IA                 |
| HL063PA2 | F4            | F          | IA                 | Nov-78                  | A1            | A          | IA                 |
| HL043PA2 | C1            | C          | IA                 | Nov-88                  | H1            | H          | IB                 |
| HL002PA3 | A2            | A          | IA                 | Oct-43                  | K2            | K          | II                 |
| HL025PA1 | D1            | D          | IA                 | 09-263                  | A1            | A          | IA                 |
| HL110PA2 | E3            | E          | IA                 | 10-113                  | C5            | C          | IA                 |
| HL074PA1 | C2            | C          | IA                 | Nov-49                  | K1            | K          | II                 |
| HL059PA1 | F1            | F          | IA                 | 9-Sep                   | K1            | K          | II                 |
| HL046PA2 | A2            | A          | IA                 | CA17                    | K1            | K          | II                 |
| HL110PA4 | K2            | K          | II                 | CA39                    | A2            | A          | IA                 |
| HL056PA1 | C2            | C          | IA                 | CA51                    | A2            | A          | IA                 |
| HL030PA1 | H1            | H          | IB                 | 09-193                  | D1            | D          | IA                 |
| HL087PA1 | F1            | F          | IA                 | 09-322                  | D1            | D          | IA                 |
| HL083PA2 | F3            | F          | IA                 | 29-Sep                  | A1            | A          | IA                 |

|           |                        |   |     |                  |              |   |     |
|-----------|------------------------|---|-----|------------------|--------------|---|-----|
| HL007PA1  | C1                     | C | IA  | UMB0211          | H1           | H | IB  |
| HL043PA1  | C1                     | C | IA  | JCM 18919        | L5           | L | III |
| HL072PA2  | A6                     | A | IA  | Asn12            | L2           | L | III |
| HL082PA1  | E5                     | E | IA  | S2_005_002_R2_31 | A1           | A | IA  |
| HL092PA1  | E1                     | E | IA  | P15-207          | G1           | G | IC  |
| HL027PA1  | F1                     | F | IA  | P15-206          | G1           | G | IC  |
| HL059PA2  | 99.79% F2, F3, F7, F11 | F | IA  | M13605           | D1           | D | IA  |
| HL036PA3  | A2                     | A | IA  | P15-186          | A1           | A | IA  |
| HL030PA2  | F4                     | F | IA  | T20574           | 99.79% K1    | K | II  |
| HL078PA1  | B1                     | B | IA  | T29350           | K1           | K | II  |
| HL037PA1  | F6                     | F | IA  | T32516           | H1           | H | IB  |
| HL013PA1  | F1                     | F | IA  | T35709           | H1           | H | IB  |
| HL087PA2  | A1                     | A | IA  | T35743           | H1           | H | IB  |
| J139      | K8                     | K | II  | T35877           | X            | X | X   |
| J165      | A1                     | A | IA  | KCOM 1315        | H1           | H | IB  |
| SK187     | E2                     | E | IA  | P15-014          | H1           | H | IB  |
| HL096PA3  | A1                     | A | IA  | P15-021          | A1           | A | IA  |
| HL096PA2  | C1                     | C | IA  | P15-159          | D1           | D | IA  |
| HL103PA1  | K1                     | K | II  | UBA11121         | A1           | A | IA  |
| HL097PA1  | G1                     | G | IC  | UBA9075          | X            | X | X   |
| HL099PA1  | C1                     | C | IA  | T14076           | H1           | H | IB  |
| 266       | A1                     | A | IA  | C-45             | 99.59% A1    | A | IA  |
| 6609      | H1                     | H | IB  | FDAARGOS_577     | C1           | C | IA  |
| SK182     | C1                     | C | IA  | FDAARGOS_503     | A1           | A | IA  |
| P.acn33   | F1                     | F | IA  | S2_006_000_R1_58 | X            | X | X   |
| P.acn17   | F5                     | F | IA  | T28794           | G1           | G | IC  |
| P.acn31   | F4                     | F | IA  | P15-181          | D1           | D | IA  |
| PRP-38    | G1                     | G | IC  | P15-088          | A1           | A | IA  |
| C1        | A5                     | A | IA  | NBRC 107605      | A1           | A | IA  |
| FZ1/2/0   | B1                     | B | IA  | ATCC 11827       | A1           | A | IA  |
| HL096PA1  | C1                     | C | IA  | TP-CU389         | F1           | F | IA  |
| DSM 1897  | A1                     | A | IA  | MIT 1869-c3-2    | H1           | H | IB  |
| HL042PA3  | K2                     | K | II  | MIT 1857-A1      | K2           | K | II  |
| PA2       | H1                     | H | IB  | MIT 1879-a3-2    | H1           | H | IB  |
| P6        | H1                     | H | IB  | MIT 1851-a4-2    | H1           | H | IB  |
| JCM 18909 | 99.38% L5              | L | III | DA10166-1        | 99.79% A1&A6 | A | IA  |
| JCM 18916 | A2                     | A | IA  | NLAE-zl-G260     | H1           | H | IB  |
| JCM 18918 | 99.79% H1              | H | IB  | KPA171202        | H2           | H | IB  |
| JCM 18920 | K1                     | K | II  | ATCC 6919        | A1           | A | IA  |
| hdn-1     | A1                     | A | IA  | P15-231          | A1           | A | IA  |
| HL411PA1  | A1                     | A | IA  | P15-077          | 99.79% A1&A6 | A | IA  |
| HL202PA1  | K13                    | K | II  | P15-089          | F4           | F | IA  |
| HL201PA1  | 99.38% L7&L8           | L | III | T36318           | F4           | F | IA  |
| 119_PAVI  | A1                     | A | IA  |                  |              |   |     |

**Table S12: p-values comparing  $\alpha$ -diversities (Shannon indices) of the *C. acnes* SLST clusters. Significant results are highlighted in yellow. Early (T1-T2) and Late (T3-T5).**

| SLST cluster | Early Normal vs. Early Acne | Early Normal vs. Late Normal | Early Acne vs. Late Acne | Late Normal vs. Late Acne |
|--------------|-----------------------------|------------------------------|--------------------------|---------------------------|
| A            | 0.213                       | 0.007                        | 0.919                    | 0.099                     |
| B            | 1                           | 1                            | 1                        | 0.782                     |
| C            | 0.266                       | 0.41                         | 0.4                      | 0.83                      |
| D            | 0.864                       | 0.027                        | 0.57                     | 0.047                     |
| E            | 0.481                       | 0.841                        | 0.702                    | 0.791                     |
| F            | 0.279                       | 0.044                        | 0.543                    | 0.418                     |
| G            | 0.242                       | 0.406                        | 0.697                    | 0.096                     |
| H            | 1                           | 0.187                        | 0.791                    | 0.04                      |
| K            | NA                          | NA                           | 0.2                      | NA                        |

**Table S13: p-values comparing  $\beta$ -diversities of the *C. acnes* SLST clusters. Significant results are highlighted in yellow. Early (T1-T2) and Late (T3-T5).**

| SLST cluster | Early Normal vs. Early Acne | Early Normal vs. Late Normal | Early Acne vs. Late Acne | Late Normal vs. Late Acne |
|--------------|-----------------------------|------------------------------|--------------------------|---------------------------|
| A            | 0.562                       | 0.011                        | 0.982                    | 0.158                     |
| B            | 1                           | 0.1                          | 1                        | 0.272                     |
| C            | 0.606                       | 0.284                        | 0.822                    | 0.28                      |
| D            | 0.254                       | 0.022                        | 0.808                    | 0.087                     |
| E            | 0.696                       | 0.336                        | 0.341                    | 0.793                     |
| F            | 0.452                       | 0.009                        | 0.718                    | 0.12                      |
| G            | 0.695                       | 0.411                        | 0.702                    | 0.627                     |
| H            | 0.046                       | 0.076                        | 0.408                    | 0.215                     |
| K            | NA                          | NA                           | 0.4                      | NA                        |

**Table S14:  $\alpha$ -diversity comparison of SLST groups.**

p-values comparing Shannon indices. Significant results are highlighted in yellow.

| SLST group   | Early Normal vs. Early Acne | Early Normal vs. Late Normal | Early Acne vs. Late Acne | Late Normal vs. Late Acne |
|--------------|-----------------------------|------------------------------|--------------------------|---------------------------|
| 99.79% A1&A6 | 1                           | 1                            | 1                        | 1                         |
| A1           | 0.053                       | 0.004                        | 1                        | 0.099                     |
| A2           | 0.786                       | 0.498                        | 0.509                    | 0.47                      |
| A5           | 0.914                       | NA                           | 0.083                    | NA                        |
| A6           | NA                          | 1                            | NA                       | 1                         |
| B1           | 1                           | 1                            | 1                        | 0.782                     |
| C1           | 0.168                       | 0.664                        | 0.505                    | 0.83                      |
| C2           | 1                           | 1                            | 0.543                    | 0.8                       |
| D1           | 0.65                        | 0.103                        | 0.545                    | 0.178                     |
| E1           | NA                          | 1                            | NA                       | 1                         |
| F1           | 0.766                       | 0.736                        | 0.101                    | 0.534                     |
| F4           | 0.456                       | 0.53                         | 0.745                    | 1                         |
| G1           | 0.242                       | 0.406                        | 0.697                    | 0.096                     |
| H1           | 0.96                        | 0.223                        | 0.685                    | 0.136                     |
| K1           | NA                          | NA                           | 0.1                      | NA                        |
| K2           | NA                          | NA                           | 1                        | NA                        |

**Table S15:  $\beta$ -diversity comparison of SLST groups.**p-values comparing  $\beta$ -diversities. Significant results are highlighted in yellow.

| SLST group   | Early Normal vs. Early Acne | Early Normal vs. Late Normal | Early Acne vs. Late Acne | Late Normal vs. Late Acne |
|--------------|-----------------------------|------------------------------|--------------------------|---------------------------|
| 99.79% A1&A6 | 0.457                       | 0.4                          | 0.46                     | 0.111                     |
| A1           | 0.759                       | 0.026                        | 0.987                    | 0.368                     |
| A2           | 0.11                        | 0.488                        | 0.146                    | 0.344                     |
| A5           | 0.943                       | NA                           | 0.346                    | NA                        |
| A6           | NA                          | 1                            | NA                       | 0.18                      |
| B1           | 1                           | 0.1                          | 1                        | 0.272                     |
| C1           | 0.483                       | 0.435                        | 0.716                    | 0.217                     |
| C2           | 0.2                         | 0.1                          | 0.343                    | 0.733                     |
| D1           | 0.284                       | 0.413                        | 0.503                    | 0.469                     |
| E1           | NA                          | 0.333                        | NA                       | NA                        |
| F1           | 0.465                       | 0.084                        | 0.854                    | 0.294                     |
| F4           | 0.641                       | 0.009                        | 0.683                    | 0.014                     |
| G1           | 0.695                       | 0.411                        | 0.702                    | 0.627                     |
| H1           | 0.043                       | 0.075                        | 0.375                    | 0.248                     |
| K1           | NA                          | NA                           | 1                        | NA                        |
| K2           | NA                          | NA                           | 0.667                    | NA                        |

**Table S16: Network mapping of significant enzymes.**

| Pathway                                             | Significant/ Total (%) | p-value    | FDR      | Enzymes                                                                                                                                                                                |
|-----------------------------------------------------|------------------------|------------|----------|----------------------------------------------------------------------------------------------------------------------------------------------------------------------------------------|
| Porphyrin and chlorophyll metabolism                | 16/69 (23.19)          | 0.00000411 | 0.000608 | K03405, K13542, K02303, K02233, K00595, K02228, K02232, K03404, K02227, K05936, K02189, K00231, K00798, K01749, K03399, K01845                                                         |
| Histidine metabolism                                | 10/35 (28.57)          | 0.0000431  | 0.00319  | K01468, K02501, K00765, K01814, K00274, K00817, K01523, K02500, K01745, K00013                                                                                                         |
| Thiamine metabolism                                 | 6/23 (26.09)           | 0.00268    | 0.0991   | K03153, K00946, K00941, K03149, K00788, K01662                                                                                                                                         |
| Terpenoid backbone biosynthesis                     | 6/23 (26.09)           | 0.00268    | 0.0991   | K13787, K01823, K01770, K03527, K01662, K00919                                                                                                                                         |
| Biosynthesis of amino acids                         | 23/222 (10.36)         | 0.0133     | 0.394    | K01817, K00930, K00611, K02501, K00765, K00620, K00215, K01814, K00817, K04092, K01609, K01523, K04517, K08094, K00058, K00145, K02500, K03786, K01778, K01647, K01735, K00812, K00013 |
| Novobiocin biosynthesis                             | 3/12 (25.00)           | 0.038      | 0.852    | K00817, K04517, K00812                                                                                                                                                                 |
| Riboflavin metabolism                               | 4/22 (18.18)           | 0.0495     | 0.852    | K14652, K11753, K00794, K01497                                                                                                                                                         |
| Phenylalanine, tyrosine and tryptophan biosynthesis | 8/64 (12.50)           | 0.0514     | 0.852    | K01817, K00817, K04092, K01609, K04517, K03786, K01735, K00812                                                                                                                         |
| Citrate cycle (TCA cycle)                           | 7/53 (13.21)           | 0.0518     | 0.852    | K18118, K00161, K00240, K01903, K01647, K00162, K00658                                                                                                                                 |
| Propanoate metabolism                               | 7/55 (12.73)           | 0.0613     | 0.87     | K00140, K01847, K00016, K11263, K01692, K01903, K05606                                                                                                                                 |

**Table S17: Unique and significant enzymes identified by network mapping.**

| Enzyme | p-value  | FDR      | Trend | Enzyme | p-value  | FDR      | Trend | Enzyme | p-value  | FDR      | Trend |
|--------|----------|----------|-------|--------|----------|----------|-------|--------|----------|----------|-------|
| K00013 | 0.00314  | 0.040671 | ↑ LA  | K00941 | 0.00071  | 0.018978 | ↑ LA  | K02232 | 0.000393 | 0.016152 | ↑ LA  |
| K00016 | 0.00014  | 0.01165  | ↑ LA  | K00946 | 0.000341 | 0.015448 | ↑ LA  | K02233 | 0.000169 | 0.012454 | ↑ LA  |
| K00058 | 0.001199 | 0.02415  | ↑ LA  | K01468 | 0.000121 | 0.010868 | ↑ LA  | K02303 | 8.51E-05 | 0.010868 | ↑ LA  |
| K00140 | 1.59E-05 | 0.009657 | ↑ LA  | K01497 | 0.002203 | 0.033221 | ↑ EA  | K02500 | 0.001553 | 0.027847 | ↑ LA  |
| K00145 | 0.001331 | 0.025793 | ↑ LA  | K01523 | 0.000764 | 0.01951  | ↑ LA  | K02501 | 0.000221 | 0.01385  | ↑ LA  |
| K00161 | 8.88E-05 | 0.010868 | ↑ LA  | K01609 | 0.000677 | 0.018897 | ↑ LA  | K03149 | 0.001088 | 0.022725 | ↑ LA  |
| K00162 | 0.003558 | 0.043971 | ↑ LA  | K01647 | 0.002371 | 0.034523 | ↑ LA  | K03153 | 8.54E-05 | 0.010868 | ↑ LA  |
| K00215 | 0.000376 | 0.016103 | ↑ LA  | K01662 | 0.002687 | 0.03691  | ↑ LA  | K03399 | 0.00199  | 0.031051 | ↑ EN  |
| K00231 | 0.001049 | 0.022198 | ↑ LA  | K01692 | 0.00063  | 0.018647 | ↑ LA  | K03404 | 0.000462 | 0.016268 | ↑ LA  |
| K00240 | 0.000435 | 0.016152 | ↑ LA  | K01735 | 0.002913 | 0.038714 | ↑ LA  | K03405 | 2.29E-05 | 0.009657 | ↑ LA  |
| K00274 | 0.000432 | 0.016152 | ↑ LA  | K01745 | 0.001595 | 0.028139 | ↑ LA  | K03527 | 0.000878 | 0.020529 | ↑ LA  |
| K00595 | 0.000184 | 0.012778 | ↑ LA  | K01749 | 0.001541 | 0.027731 | ↑ LA  | K03786 | 0.001676 | 0.028549 | ↑ LA  |
| K00611 | 0.000165 | 0.012454 | ↑ LA  | K01770 | 0.000752 | 0.019327 | ↑ LA  | K04092 | 0.000576 | 0.018162 | ↑ LA  |
| K00620 | 0.00034  | 0.015448 | ↑ LA  | K01778 | 0.0018   | 0.029713 | ↑ LA  | K04517 | 0.000851 | 0.020474 | ↑ LA  |
| K00658 | 0.003793 | 0.045342 | ↑ LA  | K01814 | 0.000384 | 0.016103 | ↑ LA  | K05606 | 0.002206 | 0.033221 | ↑ LA  |
| K00765 | 0.000252 | 0.014778 | ↑ LA  | K01817 | 0.000116 | 0.010868 | ↑ LA  | K05936 | 0.000687 | 0.018897 | ↑ LA  |
| K00788 | 0.001089 | 0.022725 | ↑ LA  | K01823 | 0.000551 | 0.017626 | ↑ LA  | K08094 | 0.001037 | 0.022172 | ↑ LA  |
| K00794 | 0.001043 | 0.022178 | ↑ LA  | K01845 | 0.003164 | 0.040862 | ↑ LA  | K11263 | 0.000187 | 0.012778 | ↑ LA  |
| K00798 | 0.001475 | 0.027245 | ↑ LA  | K01847 | 2.64E-05 | 0.009657 | ↑ LA  | K11753 | 0.000683 | 0.018897 | ↑ LA  |
| K00812 | 0.002944 | 0.038907 | ↑ EN  | K01903 | 0.000859 | 0.020529 | ↑ LA  | K13542 | 8.46E-05 | 0.010868 | ↑ LA  |
| K00817 | 0.000542 | 0.01758  | ↑ LA  | K02189 | 0.000774 | 0.019556 | ↑ EN  | K13787 | 0.000497 | 0.017079 | ↑ LA  |
| K00919 | 0.003394 | 0.04265  | ↑ LA  | K02227 | 0.000528 | 0.017502 | ↑ LA  | K14652 | 0.000295 | 0.014931 | ↑ LA  |
| K00930 | 0.000164 | 0.012454 | ↑ LA  | K02228 | 0.000272 | 0.014931 | ↑ LA  | K18118 | 2.35E-05 | 0.009657 | ↑ LA  |

## Supplemental Figures

### Supplemental Figure S1

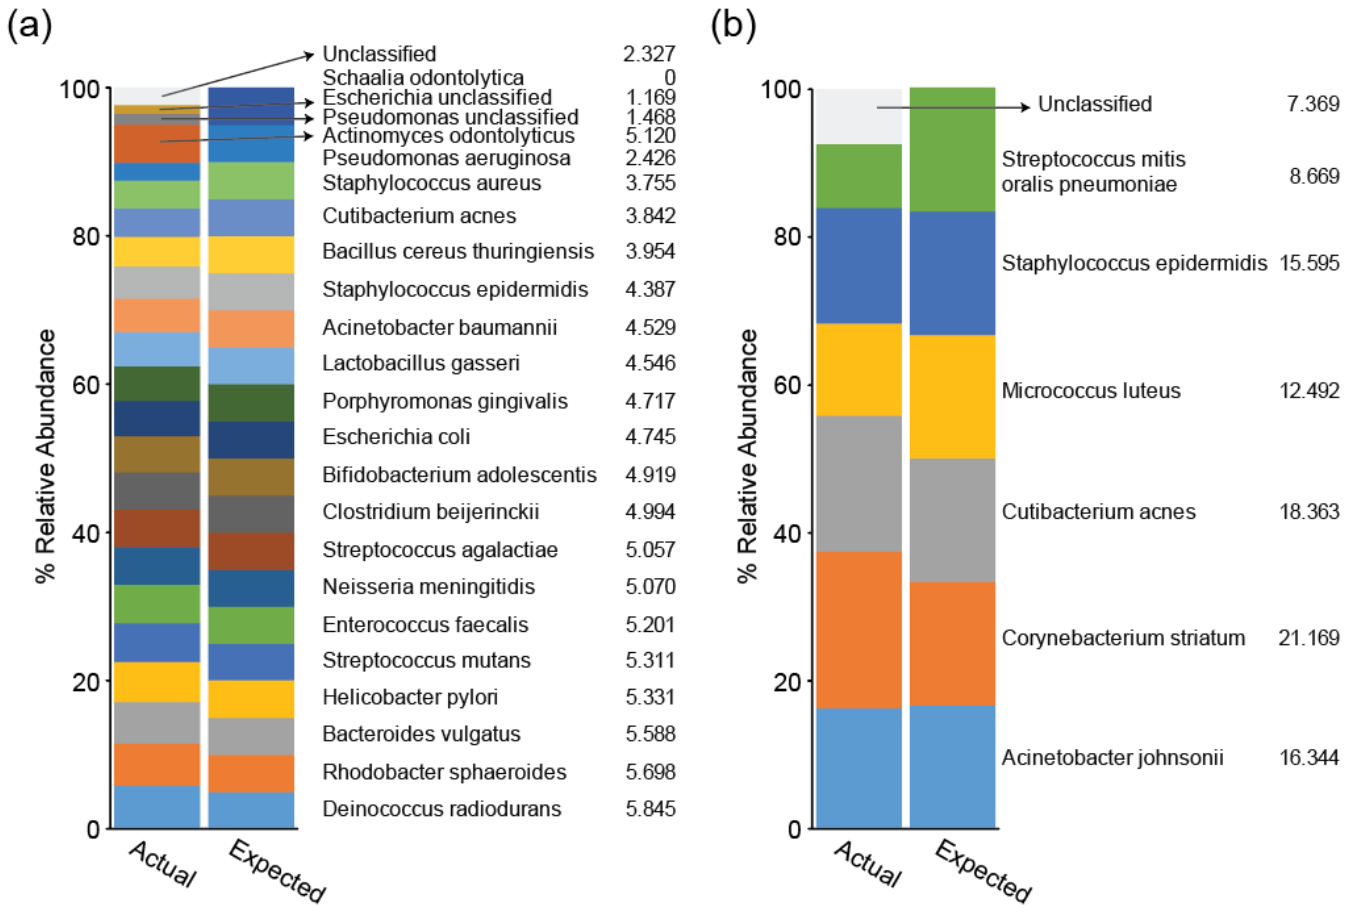

(c)

|                                 | NC 1 (%) | NC 2 (%) | NC 3 (%) | NC 4 (%) | NC 5 (%) | Average |
|---------------------------------|----------|----------|----------|----------|----------|---------|
| Atopobium vaginae               | 0        | 0        | 0        | 0        | 0.026    | 0.005   |
| Cutibacterium acnes             | 0        | 0        | 0        | 0.021    | 0        | 0.004   |
| <b>Escherichia coli</b>         | 90.182   | 94.829   | 96.912   | 95.563   | 94.621   | 94.421  |
| <b>Escherichia unclassified</b> | 9.818    | 4.914    | 2.985    | 4.356    | 5.261    | 5.467   |
| Pantoea unclassified            | 0        | 0.174    | 0.103    | 0        | 0.079    | 0.071   |
| Prevotella bivia                | 0        | 0        | 0        | 0        | 0.013    | 0.003   |

**Supplemental Figure S1** Positive and negative control data. (a) 20 Strain Even Mix Genomic Material MSA-1002 (purchased from ATCC). Species level detection of MSA-1002 showing actual sequenced values and expected composition. MCC is composed of 20 expected species at 5% relative abundance, we detected 22 species and 1 unclassified group with percent abundance denoted next to name. *Schaalia odontolytica* present at 5% abundance in the control was not detected in our sequencing run. Three species not included in the mock community control were also detected at variable levels of abundance. (b) Skin Microbiome Genomic Mix MSA-1005 (purchased from ATCC). Species level detection of actual sequenced values compared to expected composition of six species at ~16.7% composition. All six species were detected in our sequencing run at variable levels, approximately 7% of the sample was unclassified at the species level. (c) Negative controls 1-5 were collected during sample collection. *Escherichia coli* was the most dominant species detected in the controls and is not a common skin commensal. Therefore, *Escherichia coli* and *Escherichia unclassified* were removed from patient sample data and further analysis. The negative control for DNA extraction (not shown above) did not yield any classifiable sequence and was removed from analysis completely (Table S3).



## Supplemental Figure S2

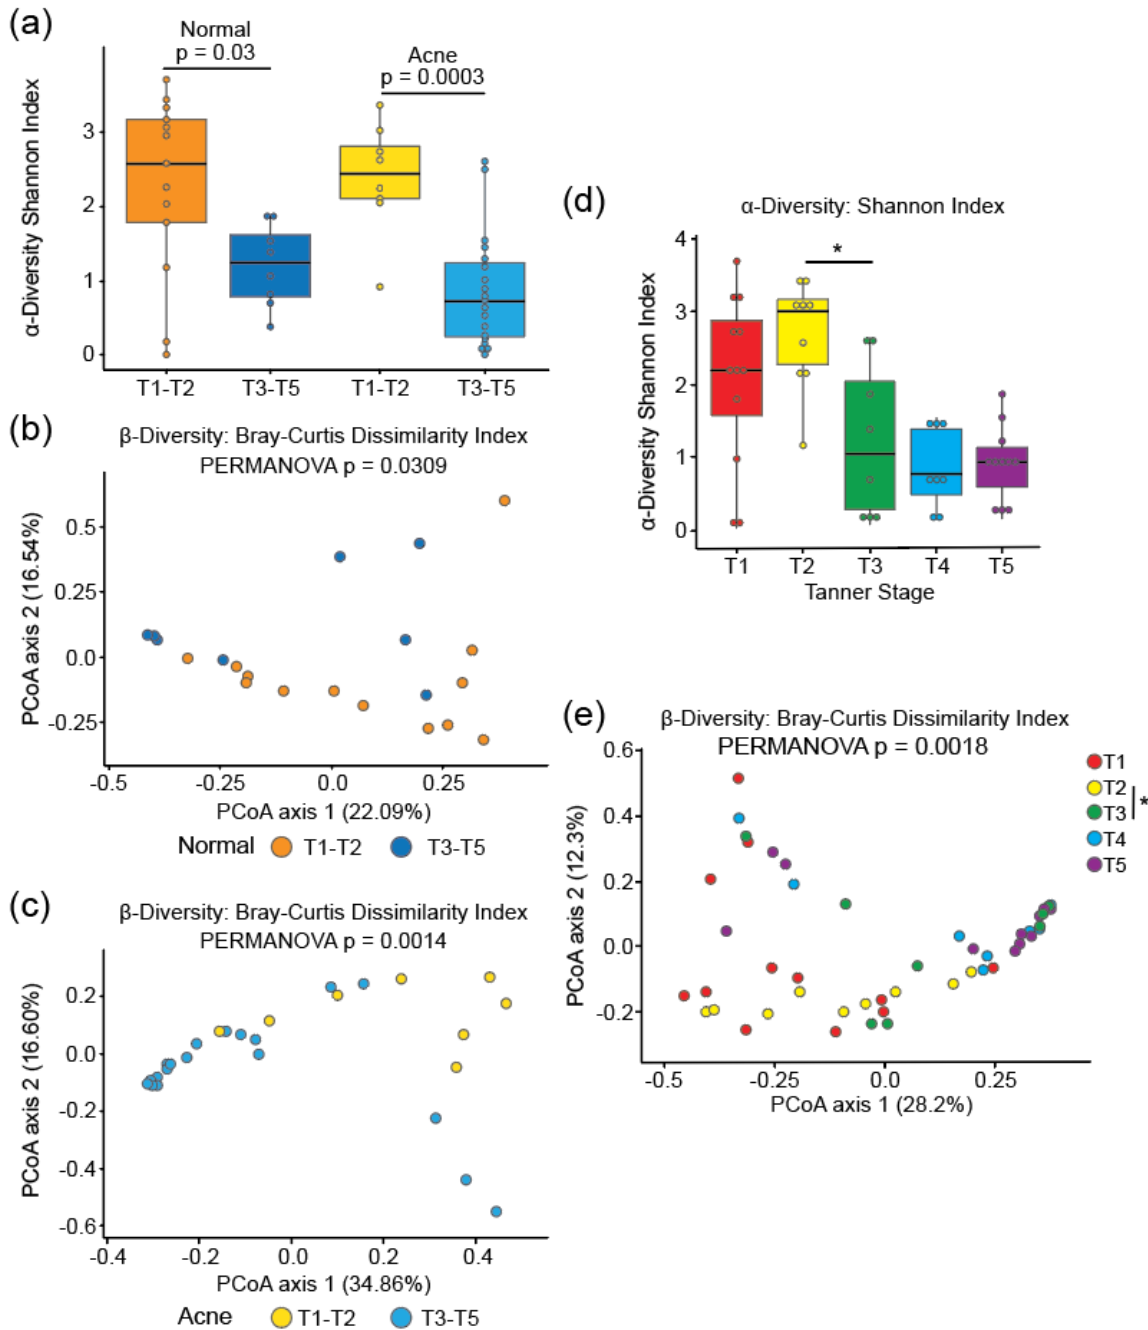

**Supplemental Figure S2**  $\alpha$ - and  $\beta$ -diversity shift significantly over puberty regardless of disease state. (a) Comparison of  $\alpha$ -diversity by disease state between early (T1-T2) and late (T3-T5) Tanner stages, Wilcoxon rank-sum test, normal  $p = 0.03$ , acne  $p = 0.0003$ . (b) Comparison of  $\beta$ -diversity between early and late Tanner stages in normal skin, PERMANOVA,  $p = 0.0309$ . (c) Comparison of  $\beta$ -diversity between early and late Tanner stages in acne skin, PERMANOVA,  $p = 0.0014$ . All Shannon indices are positive, the minimum is 0.0074. (d)  $\alpha$ -diversity of all samples stratified by Tanner stage; Wilcoxon rank sum test between consecutive Tanner stages; T2 vs T3  $p = 0.0079$ . (e) Principal Coordinates Analysis (PCoA) plot visualizing Bray Curtis Dissimilarity Index ( $\beta$ -diversity); PERMANOVA between all Tanner stages,  $p = 0.0018$ ; PERMANOVA between consecutive Tanner stages, T2 vs T3  $p = 0.0336$ .

**Supplemental Figure S3**

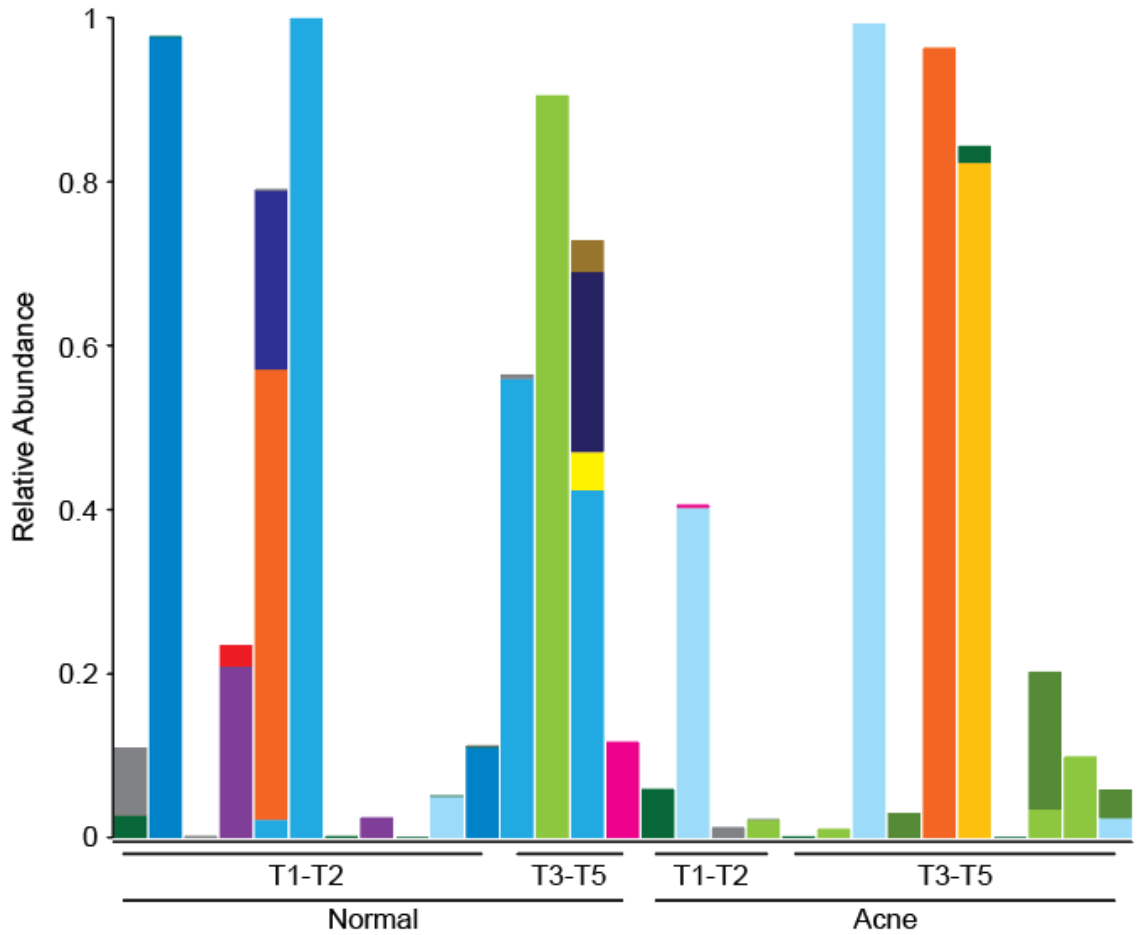

| Genus               | Species                                                            |
|---------------------|--------------------------------------------------------------------|
| Betapapillomavirus  | Betapapillomavirus 3, Betapapillomavirus 1, Betapapillomavirus 5   |
| Papillomaviridae    | Human papillomavirus 161 like viruses                              |
| Siphoviridae        | Propioni. phage P101A, Propioni. phage P100D, Staph. phage phiETA3 |
| Polyomavirus        | Polyomavirus HPyV6                                                 |
| Alphapapillomavirus | Alphapapillomavirus 2, Alphapapillomavirus 4                       |
| Myoviridae          | Strep. phage EJ 1                                                  |
| Retroviridae        | Avian endogenous retrovirus EAV HP                                 |
| C2-like virus       | C2-like virus                                                      |
| Gammaretrovirus     | Porcine type C oncovirus                                           |
| Unclassified        | Staph. phage phi2958PVL                                            |
| Lambda-like virus   | Enterobacteria phage HK633                                         |

**Supplemental Figure S3** Viral composition by species and individual patient. Viral composition of each individual patient (29/48) by species, patients with no viral species were excluded from this graph. Each species in the legend is clustered by Genus. Propioni. - Propionibacterium, Staph. - Staphylococcus, Strep. - Streptococcus.

# Supplemental Figure S4

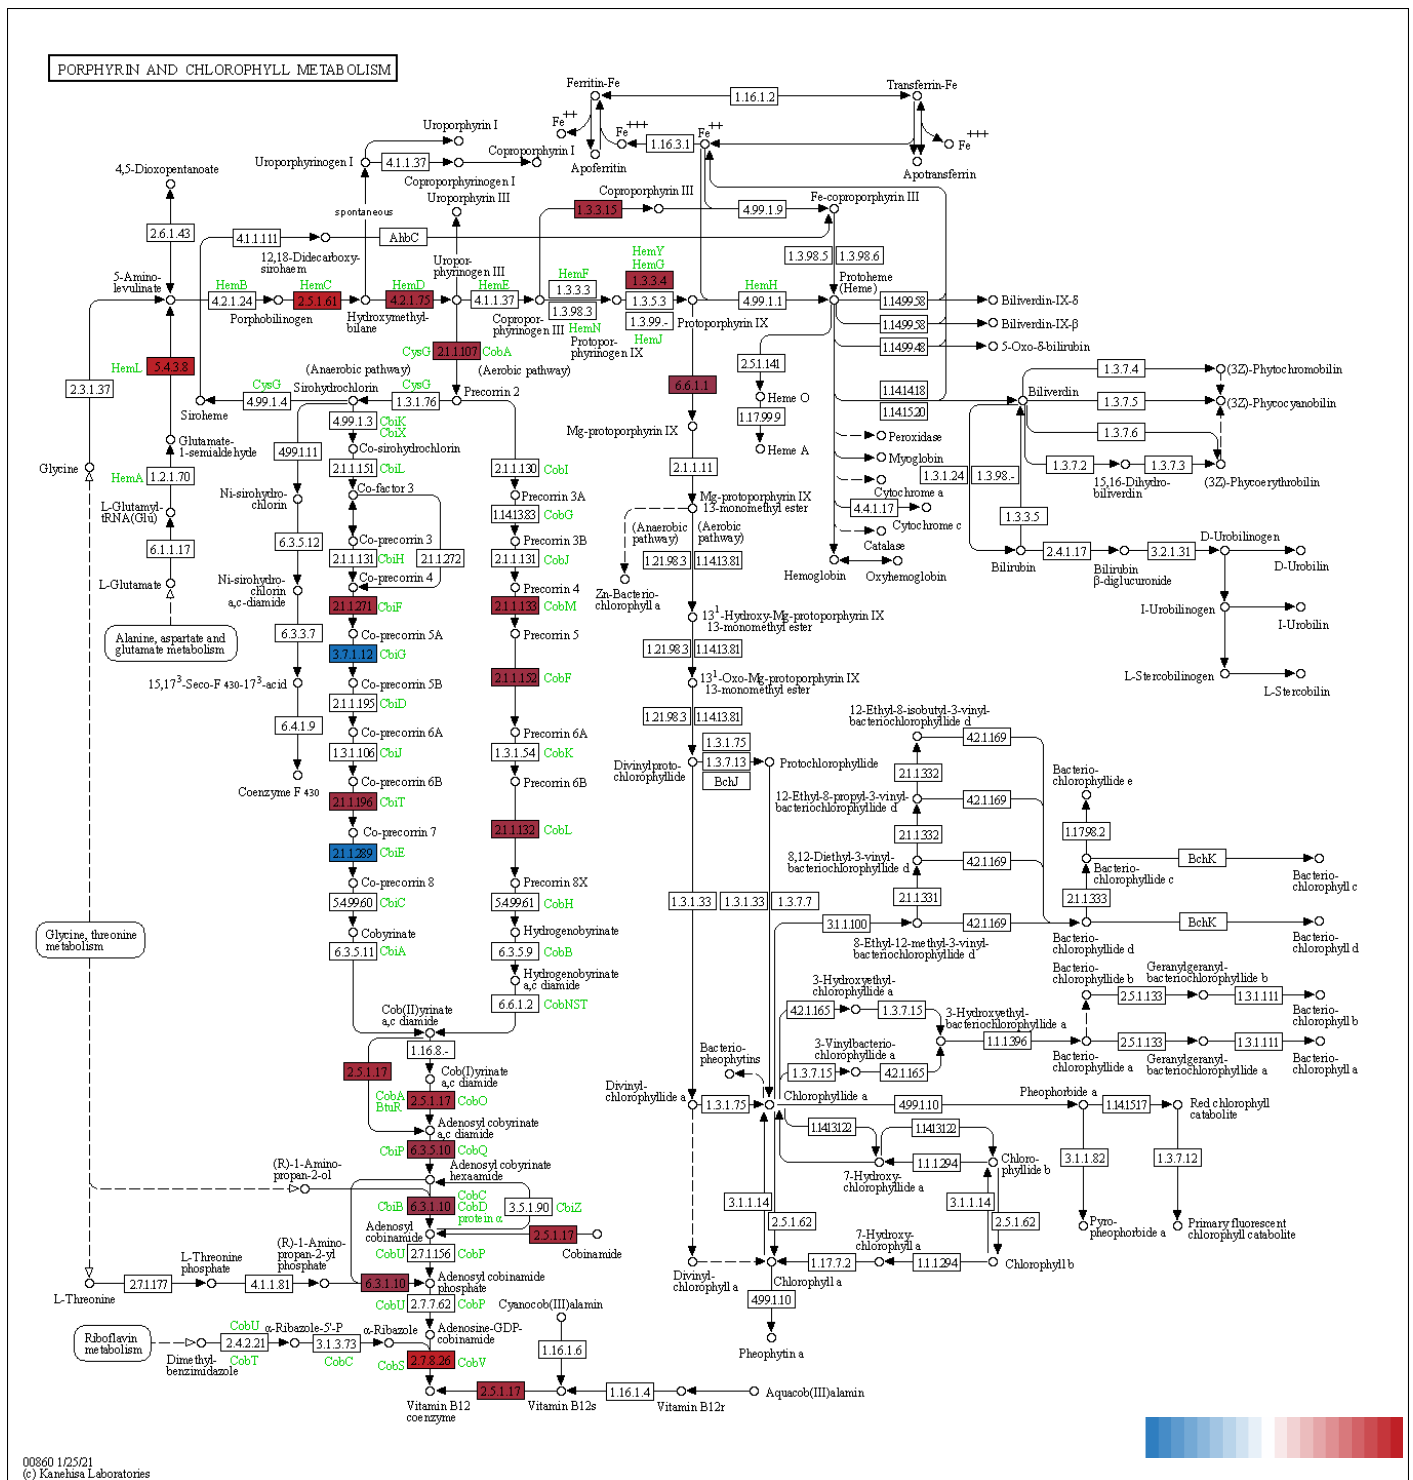

**Supplemental Figure S4** KEGG Pathway map of *Porphyrin and Chlorophyll Metabolism* identifying location of the 16 significantly enriched KO terms. From Supplemental Table S14, significantly enriched KO terms associated with KEGG Pathway *Porphyrin and Chlorophyll Metabolism* (n = 16; colored) all map to the porphyrin synthesis/vitamin B usage arm of the pathway, with limited involvement of the chlorophyll arm of the pathway. Pathway obtained from <https://www.genome.jp/kegg/ko.html> after input of 16 KO terms. Scale: least to greatest expression- blue to red; white = no change in expression levels)

## **Supplemental Results**

### **Non-human Sequences Summary**

*C. acnes* dominated the bacterial landscape, but other skin commensals, *Staphylococcal* and *Streptococcal* spp. were detected in young and older pediatric skin, regardless of the presence of acne. We detected minimal *Corynebacterium* in our samples. This finding may be attributed to the fact that *Corynebacterium* prefers moist body sites over sebaceous body sites and that the relative abundance of *Corynebacterium* increases with increasing adult age.<sup>24-26</sup> Aside from bacteria, we also identified viruses that are uniquely present in either acne or normal skin in our pediatric cohort (Tables S8-S9, Fig. S3). While a thorough assessment of the viral composition in pediatric skin or in acne skin has not been done, viruses and bacteriophages present on healthy skin in adults including Papilloma and Pox viruses, and *Propionibacterium* and *Staphylococcus* phages.<sup>27</sup> Similar to bacteria, viruses display body-site specificity, although viral composition is much less stable overtime. Given that children have a more diverse and variable skin microbiome than adults and the transient nature of the virome, a larger, more comprehensive study in a pediatric population is needed to identify resident viruses and determine their contribution to skin health or diseases, such as acne.

## **Supplemental References:**

- 1 Marshall WA, Tanner JM. Variations in the pattern of pubertal changes in boys. *Arch Dis Child* 1970; **45**:13–23.
- 2 Marshall WA, Tanner JM. Variations in pattern of pubertal changes in girls. *Arch Dis Child* 1969; **44**:291–303.
- 3 (CDER) C for DE and R. Acne Vulgaris: Developing Drugs for Treatment. 2005.
- 4 Andrews S (2010). FastQC: A quality control tool for high throughput sequence data [WWW Document]. URL <http://www.bioinformatics.babraham.ac.uk/projects/fastqc/>.
- 5 Martin M. Cutadapt removes adapter sequences from high-throughput sequencing reads. *EMBnet.journal* 2011; **17**:10.
- 6 Bolger AM, Lohse M, Usadel B. Trimmomatic: A flexible trimmer for Illumina sequence data. *Bioinformatics* 2014; **30**:2114–20.
- 7 Clarke EL, Taylor LJ, Zhao C, *et al.* Sunbeam: An extensible pipeline for analyzing metagenomic sequencing experiments. *Microbiome* 2019; **7**:46.
- 8 Truong DT, Franzosa EA, Tickle TL, *et al.* MetaPhlan2 for enhanced metagenomic taxonomic profiling. *Nat Methods* 2015; **12**:902–3.
- 9 Oh J, Byrd AL, Deming C, *et al.* Biogeography and individuality shape function in the human skin metagenome. *Nature* 2014; **514**:59–64.
- 10 Meisel JS, Hannigan GD, Tyldsley AS, *et al.* Skin Microbiome Surveys Are Strongly Influenced by Experimental Design. *J Invest Dermatol* 2016; **136**:947–56.
- 11 Anderson MJ. A new method for non-parametric multivariate analysis of variance. *Austral Ecol* 2001; **26**:32–46.
- 12 Albanese D, Donati C. Strain profiling and epidemiology of bacterial species from metagenomic sequencing. *Nat Commun* 2017; **8**:2260.
- 13 Langmead B, Salzberg SL. Fast gapped-read alignment with Bowtie 2. *Nat Methods* 2012; **9**:357–9.
- 14 Li H, Handsaker B, Wysoker A, *et al.* The Sequence Alignment/Map format and SAMtools. *Bioinformatics* 2009; **25**:2078–9.
- 15 Scholz CFP, Jensen A, Lomholt HB, *et al.* A novel high-resolution single locus sequence typing scheme for mixed populations of *Propionibacterium acnes* in vivo. *PLoS One* 2014; **9**:e104199.
- 16 McDowell A. Over a Decade of *recA* and *tly* Gene Sequence Typing of the Skin Bacterium *Propionibacterium acnes*: What Have We Learnt? *Microorganisms* 2017; **6**:1.
- 17 Scholz CFP, Brüggemann H, Lomholt HB, *et al.* Genome stability of *Propionibacterium acnes*: A comprehensive study of indels and homopolymeric tracts. *Sci Rep* 2016; **6**:1–12.
- 18 Brüggemann H, Salar-Vidal L, Gollnick HPM, Lood R. A Janus-Faced Bacterium: Host-Beneficial and -Detrimental Roles of *Cutibacterium acnes*. *Front Microbiol* 2021; **12**:673845.
- 19 Kopylova E, Noé L, Touzet H. SortMeRNA: Fast and accurate filtering of ribosomal RNAs in metatranscriptomic data. *Bioinformatics* 2012; **28**:3211–7.
- 20 Franzosa EA, McIver LJ, Rahnavard G, *et al.* Species-level functional profiling of metagenomes and metatranscriptomes. *Nat Methods* 2018; **15**:962–8.
- 21 Dhariwal A, Chong J, Habib S, *et al.* MicrobiomeAnalyst: a web-based tool for comprehensive statistical, visual and meta-analysis of microbiome data. *Nucleic Acids Res* 2017; **45**:W180–8.

- 22 Ewing B, Hillier LD, Wendl MC, Green P. Base-calling of automated sequencer traces using phred. I. Accuracy assessment. *Genome Res* 1998; **8**:175–85.
- 23 Ewing B, Green P. Base-calling of automated sequencer traces using phred. II. Error probabilities. *Genome Res* 1998; **8**:186–94.
- 24 Grice EA, Kong HH, Conlan S, *et al.* Topographical and temporal diversity of the human skin microbiome. *Science* 2009; **324**:1190–2.
- 25 Oh J, Conlan S, Polley EC, *et al.* Shifts in human skin and nares microbiota of healthy children and adults. *Genome Med* 2012; **4**:77.
- 26 Dimitriu PA, Iker B, Malik K, *et al.* New insights into the intrinsic and extrinsic factors that shape the human skin microbiome. *MBio* 2019; **10**.
- 27 Hannigan GD, Meisel JS, Tyldsley AS, *et al.* The human skin double-stranded DNA virome: topographical and temporal diversity, genetic enrichment, and dynamic associations with the host microbiome. *MBio* 2015; **6**:e01578-15.
